# Supplementary material for: Valuing Politics: Explaining Citizen’s Normative Conceptions of Citizenship
Source: Springer Nature journal article supplement (doi:10.1007/s11109-022-09773-7), 2022-01-28
Supplement: MOESM1 [file 20078184]

**Supplementary Materials for**

**Valuing Politics: Explaining Citizen’s Normative Conceptions of Citizenship**

Joshua Robison

**Table of Contents**

1. Online Appendix A
   1. Table OA1: Sample Sizes and Response Rates for Countries in the ESS (p. 2)
   2. Figure OA1: Distribution of Duty Measures (p. 3)
   3. Table OA2: PVQ Values Questions and Wordings (p. 4)
   4. Coding of Independent Variables (p. 5)
   5. Full Model Results
      1. Table OA3: Value Orientations and Voting in Elections (p. 7)
      2. Table OA4: Value Orientations and Obey All Laws/Regulations (p. 10)
      3. Table OA5: Value Orientations and Supporting Others (p. 13)
      4. Table OA6: Value Orientations and Forming Own Opinions (p. 16)
      5. Table OA7: Value Orientations and Volunteering (p. 19)
      6. Table OA8: Value Orientations and Being Active in Politics (p. 22)
2. Online Appendix B: Alternative Specifications (p. 25)
   1. Different Specification of Relative Value Orientation Scales: Figures OB1 and OB2 (p. 25-27)
   2. Omitting Conformity Values from the Measurement of Conservation Values: Figures OB3 & OB4 (p. 27-29)
   3. Comparison of Values and Demographics (without controls for values): Figures OB5 & OB6 (p. 31-33)
   4. Analyses without Belgium: Table OB1 & Figure OB7 (p. 34-36)
   5. Personality Trait Analyses: Figure OB8 & Tables OB2-OB3 (p. 37-41)
3. References (p. 42)

**Online Appendix A**

**Table OA1:** Sample Characteristics by Country

| Country | Country N | Response Rate |
| --- | --- | --- |
| Austria (AT) | 2,257 | 60.4% |
| Belgium (BE) | 1,899 | 59.2% |
| Czech Republic (CZ) | 1,322 | 43.3% |
| Germany (DE) | 2,919 | 55.7% |
| Denmark (DK) | 1,506 | 67.6% |
| Spain (ES) | 1,729 | 53.2% |
| Finland (FI) | 2,000 | 73.2% |
| France (FR) | 1,503 | 43.1% |
| Great Britain (GB) | 2,052 | 55.5% |
| Greece (GR) | 2,566 | 80.0% |
| Hungary (HU) | 1,685 | 69.7% |
| Ireland (IE) | 2,046 | 64.5% |
| Israel (IL) | 2,499 | 71.0% |
| Netherlands (NL) | 2,364 | 67.9% |
| Norway (NO) | 2,036 | 65.0% |
| Poland (PL) | 2,110 | 73.2% |
| Portugal (PT) | 1,511 | 68.8% |
| Sweden (SE) | 1,999 | 69.5% |
| Slovenia (SI) | 1,519 | 70.5% |
| Switzerland (CH) | 2040 | 33.5% |
| Total/Average | 39,562 | 62.2% |

*Notes*: Response rates are AAPOR RR1 and are obtained from the ESS 2002 Documentation Report (*ESS1 - 2002 Documentation Report, Edition 6.3*, 2012).

**Figure OA1:** Distribution of Duty Measures5

**
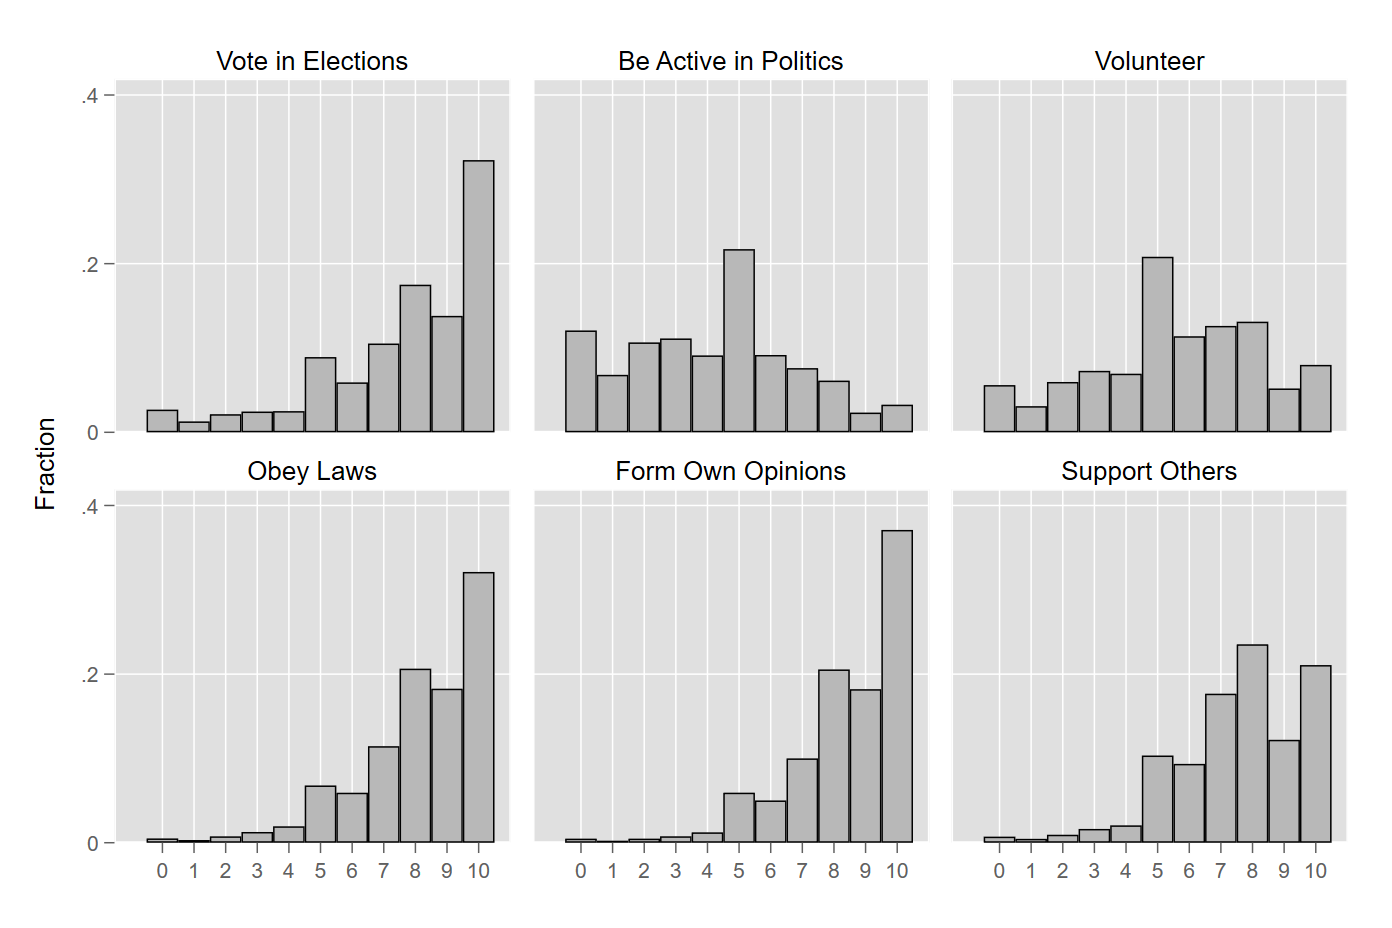
**

**Notes:** Bars provide the fraction of respondents giving each response for the respective civic duty norm.

**Table OA2:** Coding of Value Dimensions

| PVQ Question | Coding |
| --- | --- |
| **Self-Transcendence/Self-Orientation Dimension** | |
| He thinks it is important that every person in the world be treated equally. He believes that everyone should have equal opportunities in life. | Coded so that higher values indicate greater identification (i.e. from not like me at all = 1 to very much like me = 6). |
| It is important to him to listen to people who are different from him. Even when he disagrees with them, he still wants to understand them. |
| He strongly believes that people should care for nature. Looking after the environment is important to him. |
| It’s very important to him to help the people around him. He wants to care for their well-being. |
| It is important for him to be loyal to his friends. He wants to devote himself to people close to him. |
| It is important to him to be rich. He wants to have a lot of money and expensive things. | Coded so that higher values indicate less identification (i.e. from 1 = very much like me to 6 = not like me at all). |
| It is important to him to get respect from others. He wants people to do what he says. |
| It’s important to him to show his abilities. He wants people to admire what he does. |
| Being very successful is important to him. He hopes people will recognize his achievements. |
|  | |
| **Conservation/Openness-to-Change** | |
| It is important to him to be humble and modest. He tries not to draw attention to himself. | Coded so that higher values indicate greater identification (i.e. from not like me at all = 1 to very much like me = 6). |
| Tradition is important to him. He tries to follow the customs handed down by his religion or his family. |
| He believes that people should do what they’re told. He thinks people should follow rules at all times, even when no-one is watching. |
| It is important to him to always behave properly. He wants to avoid doing anything people would say is wrong. |
| It is important to him that the government to ensure his safety against all threats. He wants the state to be strong so it can defend its citizens. |
| It is important to him to live in secure surroundings. He avoids anything that might endanger his safety. |
| Having a good time is important to him. He likes to “spoil” himself. | Coded so that higher values indicate less identification (i.e. from 1 = very much like me to 6 = not like me at all). |
| He seeks every change he can to have fun. It is important to him to do things that give him pleasure. |
| He likes surprises and is always looking for new things to do. He thinks it is important to do lots of different things in life. |
| He looks for adventures and likes to take risks. He wants to have an exciting life. |
| Thinking up new ideas and being creative is important to him. He likes to do things in his own original way. |
| It is important to him to make his own decisions about what he does. He likes to be free to plan and not depend on others. |

Note: While “he” is used in the questions listed below, the appropriate gender pronoun is used on the actual survey.

**Coding of Control Variables**

All non-binary or non-categorical variables were rescaled to range from 0-1 in the analyses reported in-text and below.

1. Individual Level Controls
   1. Age: Respondent age in years.
   2. Gender: 0 = male, 1 = female
   3. Birth Status: 1 (baseline category) = Born in Country, 2 = Not Born in Country, Came to Country less than 20 years ago; 3 = Not Born in Country, Came to Country 20+ years ago
   4. Minority: 0 = not a member of an ethnic minority group, 1 = member of ethnic group (as indicated by the respondent)
   5. Own Education: 1 (baseline category) = lower than secondary education, 2 = lower secondary completed, 3 = upper secondary completed, 4 = post-secondary non-tertiary completed, 5 = tertiary education completed
   6. Father’s Education: 0 = Category cannot be harmonized with scheme, 1 (baseline category) = lower than secondary (remaining categories the same as own education)
   7. Union: 0 = never a member of a union, 1 = currently/previously a member of a union
   8. Social Trust: An index formed by averaging responses to three questions, each on a 0-10 scale: (1) “Would you say that most people can be trusted or that you can’t be too careful in dealing with people” [0=can’t be too careful, 10=most can be trusted]; (2) “Do you think that most people would try to take advantage of your if they got the change or would they try to be fair?” [0=most people would try to take advantage, 10 = most people would try to be fair]; (3) “Would you say that most of the time people try to be helpful or that they are mostly looking out for themselves” [0==mostly look out for themselves; 10=people mostly try to be helpful]. A principal components analysis showed only a single dimension with an eigenvalue > 1. Alpha = 0.76. Original range: 0-10 (higher = more trust).
   9. Social Engagement: Respondents to an item asking respondents “how often do you meet socially with friends, relatives, or work colleagues” ranging from 1 (never) to 7 (every day).
   10. Religiosity: The factor score (M=0, SD=1) from a principal component factor analysis of three items: (1) “Regardless of whether you belong to a particular religion, how religious would you say you are” [0=not at all, 10=very religious]; (2) “Apart from special occasions such as weddings and funderals, about how often do you attend religious services nowadays” [1=never, 7=every day]; (3) “how often, if at all, do you pray” [1=never, 7=every day]. A principal components factor analysis of these three items revealed a single dimension explaining the vast majority of variation across them (First dimension: EV = 2.27, proportion explained = 0.76; Second dimension: EV = 0.41, proportion explained = 0.14). All three items loaded substantially on this dimension (factor loeadings of 0.87, 0.85, and 0.89 respectively).
   11. Residential Stability: number of years in which the respondent has lived in their area.
2. Macro Level Variables
   1. Socialist Country: 1 = country was part of Soviet Bloc or Socialist in government in the post-war period (Czech Republic, Hungary, Poland, Slovenia), 0 = was not.
   2. Age of Democracy: The number of years of democracy in a country. The underlying data is obtained from Boix, Miller, and Rosato’s dichotomous coding of democracy dataset. This measure is simply the sum of years a country is coded as democratic. The underlying data can be obtained [here](https://sites.google.com/site/mkmtwo/data).
   3. Ethnic Heterogeneity: Ethnic heterogeneity data is taken from Table A1 in Alesina et al. (2003).

**Table OA3**: Value Orientations and Voting in Elections

|  | (1) | (2) | (3) |
| --- | --- | --- | --- |
|  | Model 1 | Model 2 | Model 3 |
|  |  |  |  |
| Self-Transcendence vs. Self-Enhancement | 0.26*** (0.03) | 0.20*** (0.03) | 0.17*** (0.03) |
|  |  |  |  |
| Conservation vs. Openness | 0.15*** (0.03) | 0.08*** (0.02) | 0.06** (0.02) |
|  |  |  |  |
| Age |  | 0.19*** (0.04) | 0.19*** (0.04) |
|  |  |  |  |
| Female |  | 0.00 (0.00) | -0.01 (0.01) |
|  |  |  |  |
| Minority Group Member |  | -0.01 (0.01) | -0.02 (0.01) |
|  |  |  |  |
| Currently/Previously in Union |  | 0.02*** (0.01) | 0.03*** (0.01) |
|  |  |  |  |
| **Own Education (Base = < Secondary)** |  |  |  |
|  |  |  |  |
| Lower Secondary |  | 0.02* (0.01) | 0.02* (0.01) |
|  |  |  |  |
| Upper Secondary |  | 0.03** (0.01) | 0.03** (0.01) |
|  |  |  |  |
| Post-Secondary, Non-Tertiary |  | 0.08*** (0.02) | 0.08*** (0.02) |
|  |  |  |  |
| Tertiary Education |  | 0.07*** (0.01) | 0.07*** (0.01) |
|  |  |  |  |
| **Father’s Education (Base = < Secondary)** |  |  |  |
|  |  |  |  |
| Lower Secondary |  | 0.02 (0.01) | 0.02 (0.01) |
|  |  |  |  |
| Upper Secondary |  | 0.02** (0.01) | 0.02** (0.01) |
|  |  |  |  |
| Post-Secondary, Non-Tertiary |  | 0.06*** (0.01) | 0.06*** (0.01) |
|  |  |  |  |
| Tertiary Education |  | 0.06*** (0.01) | 0.05*** (0.01) |
|  |  |  |  |
| Other Ed Level |  | 0.09*** (0.03) | 0.09*** (0.02) |
|  |  |  |  |
| **Born in Country? (Base = Yes)** |  |  |  |
|  |  |  |  |
| No, Came to Country <20 Yrs Ago |  | -0.01 (0.02) | -0.02 (0.01) |
|  |  |  |  |
| No, Came to Country 20+ Yrs Ago |  | 0.00 (0.01) | -0.00 (0.01) |
|  |  |  |  |
| Interpersonal Trust |  |  | 0.10*** (0.03) |
|  |  |  |  |
| Freq of Social Interactions |  |  | 0.04* (0.02) |
|  |  |  |  |
| Religiosity |  |  | 0.10*** (0.01) |
|  |  |  |  |
| Residential Stability |  |  | -0.01 (0.01) |
|  |  |  |  |
| Years of Democracy |  | 0.15 (0.10) | 0.13 (0.09) |
|  |  |  |  |
| Ethnic Heterogeneity |  | -0.14* (0.07) | -0.14* (0.06) |
|  |  |  |  |
| Socialist Country |  | 0.08 (0.07) | 0.08 (0.07) |
|  |  |  |  |
| Constant | 0.51*** (0.04) | 0.42*** (0.06) | 0.35*** (0.07) |
| **Random Effect Variances** |  |  |  |
| SD(Self-Transcendence) | 0.07*** (0.02) | 0.07*** (0.02) | 0.06*** (0.02) |
|  |  |  |  |
| SD(Conservation) | 0.09*** (0.02) | 0.09*** (0.02) | 0.08*** (0.02) |
|  |  |  |  |
| SD(Constant) | 0.11*** (0.03) | 0.08*** (0.02) | 0.07*** (0.02) |
| Observations | 36157 | 32424 | 31487 |
| *AIC* | 3019.17 | 1363.14 | 783.81 |
| *BIC* | 3078.64 | 1522.48 | 942.60 |

Standard errors in parentheses

Models use survey weights. Value orientation slopes are allowed to vary across countries. All continuous variables are scaled to range from 0-1.

* *p* < 0.05, ** *p* < 0.01, *** *p* < 0.001

**Table OA3**: Value Orientations and Obey All Laws/Regulations

|  | (1) | (2) | (3) |
| --- | --- | --- | --- |
|  | Model 1 | Model 2 | Model 3 |
|  |  |  |  |
| Self-Transcendence vs. Self-Enhancement | 0.13*** (0.02) | 0.12*** (0.02) | 0.10*** (0.02) |
|  |  |  |  |
| Conservation vs. Openness | 0.41*** (0.03) | 0.40*** (0.04) | 0.40*** (0.04) |
|  |  |  |  |
| Age |  | 0.03*** (0.01) | 0.01 (0.02) |
|  |  |  |  |
| Female |  | 0.00 (0.00) | -0.00 (0.00) |
|  |  |  |  |
| Minority Group |  | -0.02 (0.01) | -0.03* (0.01) |
|  |  |  |  |
| Currently/Previously in Union |  | 0.01*** (0.00) | 0.02*** (0.00) |
|  |  |  |  |
| **Own Education (Base = < Secondary)** |  |  |  |
|  |  |  |  |
| Lower Secondary |  | 0.00 (0.01) | 0.00 (0.01) |
|  |  |  |  |
| Upper Secondary |  | 0.00 (0.01) | 0.00 (0.01) |
|  |  |  |  |
| Post-Secondary, Non-Tertiary |  | 0.00 (0.01) | 0.00 (0.01) |
|  |  |  |  |
| Tertiary Education |  | -0.00 (0.01) | -0.00 (0.01) |
|  |  |  |  |
| **Father’s Education (Base = < Secondary)** |  |  |  |
|  |  |  |  |
| Lower Secondary |  | 0.02 (0.01) | 0.02 (0.01) |
|  |  |  |  |
| Upper Secondary |  | 0.01* (0.01) | 0.01 (0.01) |
|  |  |  |  |
| Post-Secondary, Non-Tertiary |  | 0.05*** (0.01) | 0.05*** (0.01) |
|  |  |  |  |
| Tertiary Education |  | 0.02*** (0.01) | 0.02*** (0.00) |
|  |  |  |  |
| Other Ed Level |  | -0.02 (0.02) | -0.01 (0.02) |
|  |  |  |  |
| **Born in Country? (Base = Yes)** |  |  |  |
|  |  |  |  |
| No, Came to Country <20 Yrs Ago |  | 0.05*** (0.01) | 0.05*** (0.01) |
|  |  |  |  |
| No, Came to Country 20+ Yrs Ago |  | 0.00 (0.01) | 0.00 (0.02) |
|  |  |  |  |
| Interpersonal Trust |  |  | 0.03 (0.02) |
|  |  |  |  |
| Freq of Social Interactions |  |  | 0.02 (0.01) |
|  |  |  |  |
| Religiosity |  |  | 0.05*** (0.01) |
|  |  |  |  |
| Residential Stability |  |  | 0.00 (0.02) |
|  |  |  |  |
| Years of Democracy |  | 0.08 (0.08) | 0.08 (0.08) |
|  |  |  |  |
| Ethnic Heterogeneity |  | -0.12 (0.07) | -0.11 (0.06) |
|  |  |  |  |
| Socialist Country |  | 0.17** (0.06) | 0.17** (0.06) |
|  |  |  |  |
| Constant | 0.51*** (0.03) | 0.46*** (0.04) | 0.43*** (0.05) |
| **Random Effect Variances** |  |  |  |
| SD(Self-Transcendence) | 0.06*** (0.02) | 0.06*** (0.02) | 0.06*** (0.02) |
|  |  |  |  |
| SD(Conservation) | 0.12*** (0.02) | 0.12*** (0.02) | 0.11*** (0.02) |
|  |  |  |  |
| SD(Constant) | 0.09*** (0.02) | 0.06*** (0.01) | 0.06*** (0.01) |
| Observations | 36287 | 32512 | 31567 |
| *AIC* | -17174.24 | -15319.99 | -15192.88 |
| *BIC* | -17114.74 | -15160.59 | -15034.04 |

Standard errors in parentheses

Models use survey weights. Value orientation slopes are allowed to vary across countries. All continuous variables are scaled to range from 0-1.

* *p* < 0.05, ** *p* < 0.01, *** *p* < 0.001

**Table OA5**: Value Orientations and Supporting Others

|  | (1) | (2) | (3) |
| --- | --- | --- | --- |
|  | Model 1 | Model 2 | Model 3 |
|  |  |  |  |
| Self-Transcendence vs. Self-Enhancement | 0.42*** (0.03) | 0.41*** (0.03) | 0.39*** (0.03) |
|  |  |  |  |
| Conservation vs. Openness | 0.05** (0.02) | 0.02 (0.02) | 0.01 (0.02) |
|  |  |  |  |
| Age |  | 0.03*** (0.01) | 0.02 (0.01) |
|  |  |  |  |
| Female |  | 0.02*** (0.00) | 0.01*** (0.00) |
|  |  |  |  |
| Minority Group |  | 0.02 (0.01) | 0.01 (0.01) |
|  |  |  |  |
| Currently/Previously in Union |  | 0.00 (0.01) | 0.00 (0.01) |
|  |  |  |  |
| **Own Education (Base = < Secondary)** |  |  |  |
|  |  |  |  |
| Lower Secondary |  | -0.00 (0.00) | -0.00 (0.00) |
|  |  |  |  |
| Upper Secondary |  | -0.01 (0.00) | -0.01 (0.01) |
|  |  |  |  |
| Post-Secondary, Non-Tertiary |  | 0.01 (0.01) | 0.00 (0.01) |
|  |  |  |  |
| Tertiary Education |  | 0.00 (0.01) | -0.00 (0.01) |
|  |  |  |  |
| **Father’s Education (Base = < Secondary)** |  |  |  |
|  |  |  |  |
| Lower Secondary |  | 0.00 (0.00) | 0.00 (0.00) |
|  |  |  |  |
| Upper Secondary |  | -0.00 (0.01) | -0.00 (0.01) |
|  |  |  |  |
| Post-Secondary, Non-Tertiary |  | -0.02 (0.02) | -0.02 (0.02) |
|  |  |  |  |
| Tertiary Education |  | 0.01 (0.01) | 0.01 (0.01) |
|  |  |  |  |
| Other Ed Level |  | -0.04 (0.03) | -0.03 (0.03) |
|  |  |  |  |
| **Born in Country? (Base = Yes)** |  |  |  |
|  |  |  |  |
| No, Came to Country <20 Yrs Ago |  | 0.02** (0.01) | 0.02 (0.01) |
|  |  |  |  |
| No, Came to Country 20+ Yrs Ago |  | 0.02* (0.01) | 0.02 (0.01) |
|  |  |  |  |
| Interpersonal Trust |  |  | 0.06*** (0.01) |
|  |  |  |  |
| Freq of Social Interactions |  |  | 0.03** (0.01) |
|  |  |  |  |
| Religiosity |  |  | 0.08*** (0.01) |
|  |  |  |  |
| Residential Stability |  |  | -0.00 (0.02) |
|  |  |  |  |
| Years of Democracy |  | 0.02 (0.08) | 0.02 (0.08) |
|  |  |  |  |
| Ethnic Heterogeneity |  | -0.02 (0.04) | -0.01 (0.04) |
|  |  |  |  |
| Socialist Country |  | 0.00 (0.05) | 0.00 (0.05) |
|  |  |  |  |
| Constant | 0.45*** (0.02) | 0.46*** (0.05) | 0.40*** (0.05) |
| **Random Effect Variances** |  |  |  |
| SD(Self-Transcendence) | 0.09*** (0.02) | 0.08*** (0.02) | 0.08*** (0.02) |
|  |  |  |  |
| SD(Conservation) | 0.06*** (0.02) | 0.05*** (0.02) | 0.06*** (0.02) |
|  |  |  |  |
| SD(Constant) | 0.06*** (0.01) | 0.06*** (0.01) | 0.05*** (0.01) |
| Observations | 36145 | 32408 | 31476 |
| *AIC* | -14162.11 | -13487.98 | -13899.90 |
| *BIC* | -14102.64 | -13328.64 | -13741.12 |

Standard errors in parentheses

Models use survey weights. Value orientation slopes are allowed to vary across countries. All continuous variables are scaled to range from 0-1.

* *p* < 0.05, ** *p* < 0.01, *** *p* < 0.001

**Table OA6:** Value Orientations and Forming Own Opinions

|  | (1) | (2) | (3) |
| --- | --- | --- | --- |
|  | Model 1 | Model 2 | Model 3 |
|  |  |  |  |
| Self-Transcendence vs. Self-Enhancement | 0.25*** (0.03) | 0.24*** (0.03) | 0.23*** (0.03) |
|  |  |  |  |
| Conservation vs. Openness | -0.14*** (0.02) | -0.10*** (0.02) | -0.09*** (0.02) |
|  |  |  |  |
| Age |  | -0.01 (0.02) | 0.01 (0.02) |
|  |  |  |  |
| Female |  | -0.01 (0.00) | -0.00 (0.00) |
|  |  |  |  |
| Minority Group |  | -0.00 (0.01) | -0.00 (0.01) |
|  |  |  |  |
| Currently/Previously in Union |  | 0.02*** (0.01) | 0.02*** (0.00) |
|  |  |  |  |
| **Own Education (Base = < Secondary)** |  |  |  |
|  |  |  |  |
| Lower Secondary |  | 0.01 (0.01) | 0.01 (0.01) |
|  |  |  |  |
| Upper Secondary |  | 0.02 (0.01) | 0.03 (0.01) |
|  |  |  |  |
| Post-Secondary, Non-Tertiary |  | 0.05*** (0.01) | 0.05*** (0.01) |
|  |  |  |  |
| Tertiary Education |  | 0.03*** (0.01) | 0.03*** (0.01) |
|  |  |  |  |
| **Father’s Education (Base = < Secondary)** |  |  |  |
|  |  |  |  |
| Lower Secondary |  | 0.01 (0.01) | 0.01 (0.01) |
|  |  |  |  |
| Upper Secondary |  | 0.01 (0.01) | 0.01 (0.01) |
|  |  |  |  |
| Post-Secondary, Non-Tertiary |  | 0.03* (0.01) | 0.03 (0.01) |
|  |  |  |  |
| Tertiary Education |  | 0.02* (0.01) | 0.02 (0.01) |
|  |  |  |  |
| Other Ed Level |  | 0.06*** (0.02) | 0.06*** (0.02) |
|  |  |  |  |
| **Born in Country? (Base = Yes)** |  |  |  |
|  |  |  |  |
| No, Came to Country <20 Yrs Ago |  | 0.00 (0.01) | 0.00 (0.01) |
|  |  |  |  |
| No, Came to Country 20+ Yrs Ago |  | -0.01 (0.01) | -0.01 (0.01) |
|  |  |  |  |
| Interpersonal Trust |  |  | -0.02 (0.01) |
|  |  |  |  |
| Freq of Social Interactions |  |  | 0.02* (0.01) |
|  |  |  |  |
| Religiosity |  |  | -0.01** (0.00) |
|  |  |  |  |
| Residential Stability |  |  | -0.02 (0.01) |
|  |  |  |  |
| Years of Democracy |  | 0.08 (0.09) | 0.09 (0.10) |
|  |  |  |  |
| Ethnic Heterogeneity |  | -0.05 (0.07) | -0.06 (0.07) |
|  |  |  |  |
| Socialist Country |  | 0.06 (0.06) | 0.07 (0.06) |
|  |  |  |  |
| Constant | 0.75*** (0.02) | 0.67*** (0.06) | 0.66*** (0.06) |
| **Random Effect Variances** |  |  |  |
| SD(Self-Transcendence) | 0.09*** (0.03) | 0.09*** (0.02) | 0.09*** (0.02) |
|  |  |  |  |
| SD(Conservation) | 0.08*** (0.02) | 0.08*** (0.02) | 0.08*** (0.02) |
|  |  |  |  |
| SD(Constant) | 0.07*** (0.02) | 0.06*** (0.02) | 0.06*** (0.02) |
| Observations | 35955 | 32269 | 31338 |
| *AIC* | -16967.38 | -16053.50 | -15913.28 |
| *BIC* | -16907.95 | -15894.24 | -15754.58 |

Standard errors in parentheses

Models use survey weights. Value orientation slopes are allowed to vary across countries. All continuous variables are scaled to range from 0-1.

* *p* < 0.05, ** *p* < 0.01, *** *p* < 0.001

**Table OA7**: Value Orientations and Volunteering

|  | (1) | (2) | (3) |
| --- | --- | --- | --- |
|  | Model 1 | Model 2 | Model 3 |
|  |  |  |  |
| Self-Transcendence vs. Self-Enhancement | 0.30*** (0.05) | 0.29*** (0.04) | 0.24*** (0.04) |
|  |  |  |  |
| Conservation vs. Openness | -0.03 (0.04) | -0.02 (0.04) | -0.07 (0.04) |
|  |  |  |  |
| Age |  | 0.04 (0.03) | -0.01 (0.04) |
|  |  |  |  |
| Female |  | 0.00 (0.01) | -0.01 (0.01) |
|  |  |  |  |
| Minority Group |  | 0.03 (0.01) | 0.01 (0.02) |
|  |  |  |  |
| Currently/Previously in Union |  | 0.02* (0.01) | 0.03** (0.01) |
|  |  |  |  |
| **Own Education (Base = < Secondary)** |  |  |  |
|  |  |  |  |
| Lower Secondary |  | 0.02 (0.01) | 0.02 (0.01) |
|  |  |  |  |
| Upper Secondary |  | 0.02*** (0.01) | 0.03** (0.01) |
|  |  |  |  |
| Post-Secondary, Non-Tertiary |  | 0.02* (0.01) | 0.03* (0.01) |
|  |  |  |  |
| Tertiary Education |  | 0.03*** (0.01) | 0.03** (0.01) |
|  |  |  |  |
| **Father’s Education (Base = < Secondary)** |  |  |  |
|  |  |  |  |
| Lower Secondary |  | 0.01 (0.01) | 0.01 (0.01) |
|  |  |  |  |
| Upper Secondary |  | 0.01 (0.01) | 0.01 (0.01) |
|  |  |  |  |
| Post-Secondary, Non-Tertiary |  | 0.03 (0.02) | 0.03 (0.02) |
|  |  |  |  |
| Tertiary Education |  | 0.02 (0.01) | 0.01 (0.01) |
|  |  |  |  |
| Other Ed Level |  | -0.10** (0.03) | -0.10*** (0.03) |
|  |  |  |  |
| **Born in Country? (Base = Yes)** |  |  |  |
|  |  |  |  |
| No, Came to Country <20 Yrs Ago |  | -0.01 (0.03) | -0.02 (0.02) |
|  |  |  |  |
| No, Came to Country 20+ Yrs Ago |  | -0.02 (0.01) | -0.02* (0.01) |
|  |  |  |  |
| Interpersonal Trust |  |  | 0.10*** (0.01) |
|  |  |  |  |
| Freq of Social Interactions |  |  | 0.07*** (0.01) |
|  |  |  |  |
| Religiosity |  |  | 0.18*** (0.01) |
|  |  |  |  |
| Residential Stability |  |  | 0.04 (0.03) |
|  |  |  |  |
| Years of Democracy |  | -0.06 (0.07) | -0.08 (0.06) |
|  |  |  |  |
| Ethnic Heterogeneity |  | 0.06 (0.06) | 0.05 (0.05) |
|  |  |  |  |
| Socialist Country |  | 0.05 (0.05) | 0.03 (0.04) |
|  |  |  |  |
| Constant | 0.38*** (0.03) | 0.34*** (0.04) | 0.24*** (0.04) |
| **Random Effect Variances** |  |  |  |
| SD(Self-Transcendence) | 0.14*** (0.04) | 0.14*** (0.04) | 0.13*** (0.03) |
|  |  |  |  |
| SD(Conservation) | 0.14*** (0.03) | 0.13*** (0.02) | 0.11*** (0.02) |
|  |  |  |  |
| SD(Constant) | 0.08*** (0.02) | 0.05*** (0.02) | 0.04*** (0.01) |
| Observations | 35884 | 32212 | 31283 |
| *AIC* | 3863.28 | 3090.98 | 1925.09 |
| *BIC* | 3922.70 | 3250.20 | 2083.76 |

Standard errors in parentheses

Models use survey weights. Value orientation slopes are allowed to vary across countries. All continuous variables are scaled to range from 0-1.

* *p* < 0.05, ** *p* < 0.01, *** *p* < 0.001

**Table OA8**: Value Orientations and Being Active in Politics

|  | (1) | (2) | (3) |
| --- | --- | --- | --- |
|  | Model 1 | Model 2 | Model 3 |
|  |  |  |  |
| Self-Transcendence vs. Self-Enhancement | 0.12*** (0.03) | 0.10** (0.03) | 0.08** (0.03) |
|  |  |  |  |
| Conservation vs. Openness | -0.06* (0.03) | -0.06** (0.02) | -0.10*** (0.03) |
|  |  |  |  |
| Age |  | 0.07*** (0.02) | 0.04** (0.01) |
|  |  |  |  |
| Female |  | -0.00 (0.00) | -0.01*** (0.00) |
|  |  |  |  |
| Minority Group |  | 0.02 (0.02) | 0.01 (0.02) |
|  |  |  |  |
| Currently/Previously in Union |  | 0.01 (0.01) | 0.02 (0.01) |
|  |  |  |  |
| **Own Education (Base = < Secondary)** |  |  |  |
|  |  |  |  |
| Lower Secondary |  | 0.03 (0.01) | 0.03* (0.01) |
|  |  |  |  |
| Upper Secondary |  | 0.03*** (0.01) | 0.04*** (0.01) |
|  |  |  |  |
| Post-Secondary, Non-Tertiary |  | 0.05*** (0.01) | 0.06*** (0.01) |
|  |  |  |  |
| Tertiary Education |  | 0.06*** (0.01) | 0.05*** (0.01) |
|  |  |  |  |
| **Father’s Education (Base = < Secondary)** |  |  |  |
|  |  |  |  |
| Lower Secondary |  | 0.01 (0.01) | 0.01 (0.01) |
|  |  |  |  |
| Upper Secondary |  | 0.00 (0.01) | 0.00 (0.01) |
|  |  |  |  |
| Post-Secondary, Non-Tertiary |  | 0.05* (0.02) | 0.05* (0.02) |
|  |  |  |  |
| Tertiary Education |  | 0.02* (0.01) | 0.02 (0.01) |
|  |  |  |  |
| Other Ed Level |  | -0.07* (0.03) | -0.06* (0.03) |
|  |  |  |  |
| **Born in Country? (Base = Yes)** |  |  |  |
|  |  |  |  |
| No, Came to Country <20 Yrs Ago |  | 0.01 (0.02) | 0.00 (0.02) |
|  |  |  |  |
| No, Came to Country 20+ Yrs Ago |  | -0.01 (0.01) | -0.02 (0.01) |
|  |  |  |  |
| Interpersonal Trust |  |  | 0.10*** (0.02) |
|  |  |  |  |
| Freq of Social Interactions |  |  | 0.02 (0.02) |
|  |  |  |  |
| Religiosity |  |  | 0.13*** (0.01) |
|  |  |  |  |
| Residential Stability |  |  | 0.02 (0.01) |
|  |  |  |  |
| Years of Democracy |  | -0.08 (0.07) | -0.08 (0.05) |
|  |  |  |  |
| Ethnic Heterogeneity |  | -0.01 (0.05) | -0.01 (0.04) |
|  |  |  |  |
| Socialist Country |  | -0.02 (0.05) | -0.02 (0.04) |
|  |  |  |  |
| Constant | 0.37*** (0.02) | 0.37*** (0.03) | 0.30*** (0.03) |
| **Random Effect Variances** |  |  |  |
| SD(Self-Transcendence) | 0.08*** (0.02) | 0.09*** (0.03) | 0.08*** (0.03) |
|  |  |  |  |
| SD(Conservation) | 0.09*** (0.02) | 0.09*** (0.02) | 0.08*** (0.02) |
|  |  |  |  |
| SD(Constant) | 0.06*** (0.01) | 0.05*** (0.01) | 0.03*** (0.01) |
| Observations | 35885 | 32211 | 31282 |
| *AIC* | 1919.44 | 1428.53 | 768.94 |
| *BIC* | 1978.86 | 1587.75 | 927.60 |

Standard errors in parentheses

Models use survey weights. Value orientation slopes are allowed to vary across countries. All continuous variables are scaled to range from 0-1.

* *p* < 0.05, ** *p* < 0.01, *** *p* < 0.001

**Online Appendix B**

We investigate alternative specifications of our in-text models in this append to probe the robustness of our results.

**Alternative Specification of Values**

Our focus is on the relative value priorities of individuals. We measured these relative priorities by reverse coding some questions in the respective value indices (see Table OA2). For instance, responses to the item “he thinks it is important that every person in the world be treated equally” were scaled such that 1 = not like me at all and 6 = very much like me, while responses to the question “it is important to him to be rich” were reverse scaled such that 1 = very much like me and 6 = not like me at all. Our reasoning here was that higher values on the resulting value dimension measures indicated *both* an acceptance of one end of the dimension (self-transcendence, conservation) and a rejection of the other end (self-enhancement, openness-to-change).

An unfortunate consequence of this coding scheme, however, was relatively poor reliability statistics for the resulting scales. In this section we thus investigate an alternative strategy for measuring relative value priorities inspired by Feldman’s (2003) study of authoritarianism, which also used measures from the Schwartz Value Theory. The two superordinate dimensions we investigate can be broken down into four underlying values: self-transcendence, self-enhancement, conservation, and openness-to-change (Goren et al., 2016, 2020). We thus calculated indices for each of these four underlying constructs by averaging together their respective value indicators with all indicators scaled such that 1 = not like me at all and 6 = very much like me. The respective indicates have higher reliabilities (Alphas: self-transcendence = 0.71; self-enhancement = 0.73; conservation = 0.74; openness-to-change=0.76). We then subtracted the respondent’s self-enhancement score from their self-transcendence score and likewise their openness-to-change score from their conservation score (and re-scaled the resulting measure to range from 0-1). Much like our measure, this too focuses on relative value priorities: does the respondent value one end of the dimension more than the other.

Figures OB1 and OB2 replicate Figures 1 and 2 from in-text but now using these difference score indicators. The only noticeable change is that self-transcendence vs. self-enhancement no longer significantly predicts the norm of “being active in politics” in Model 3 although, at the same time, the influence of conservation vs. self-enhancement is on volunteering is now statistically significant where it wasn’t in Figure 1. Overall, a comparison of Figures 1 & 2 with OB1 and OB2 show that estimates only change by very small degrees, generally on the order of differences of 0.02 or 0.03 in size. Our results in text thus does not appear to be driven by this measurement choice.

**Figure OB1:** Replication of In-Text Figure 1 with Different Specification of Value Priorities


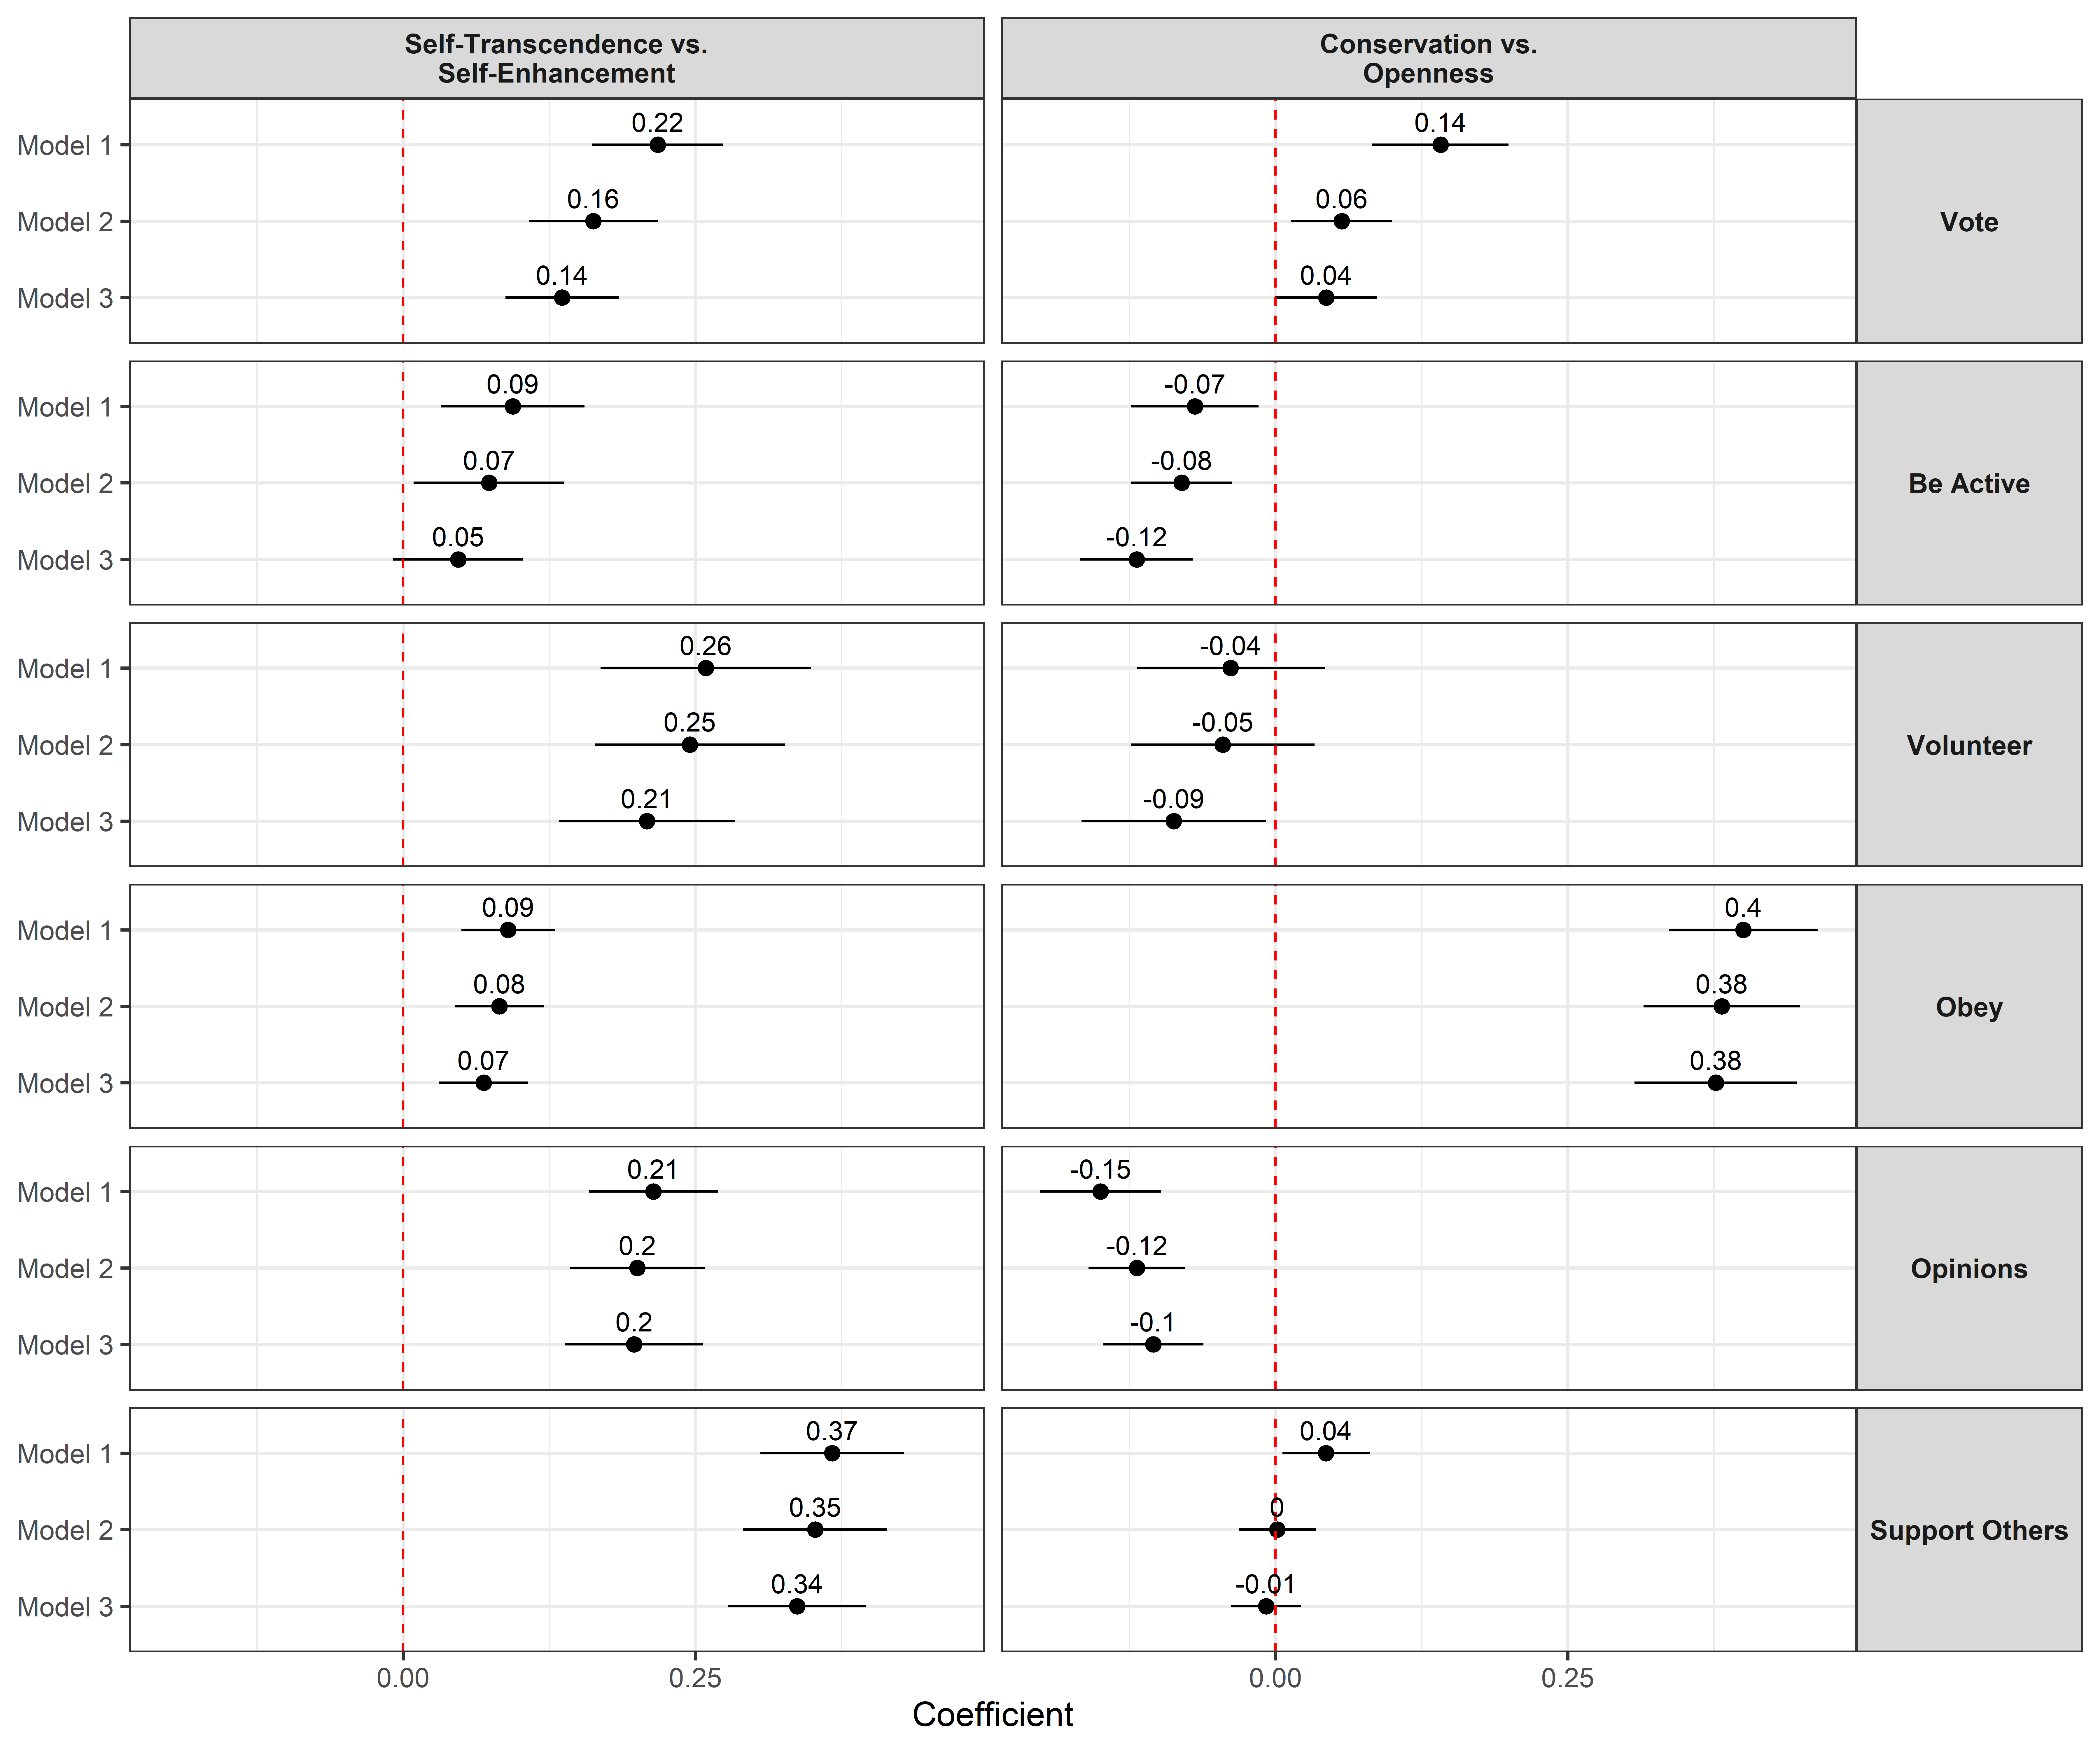


**Figure OB2:** Replication of Figure 2 with Different Value Specification


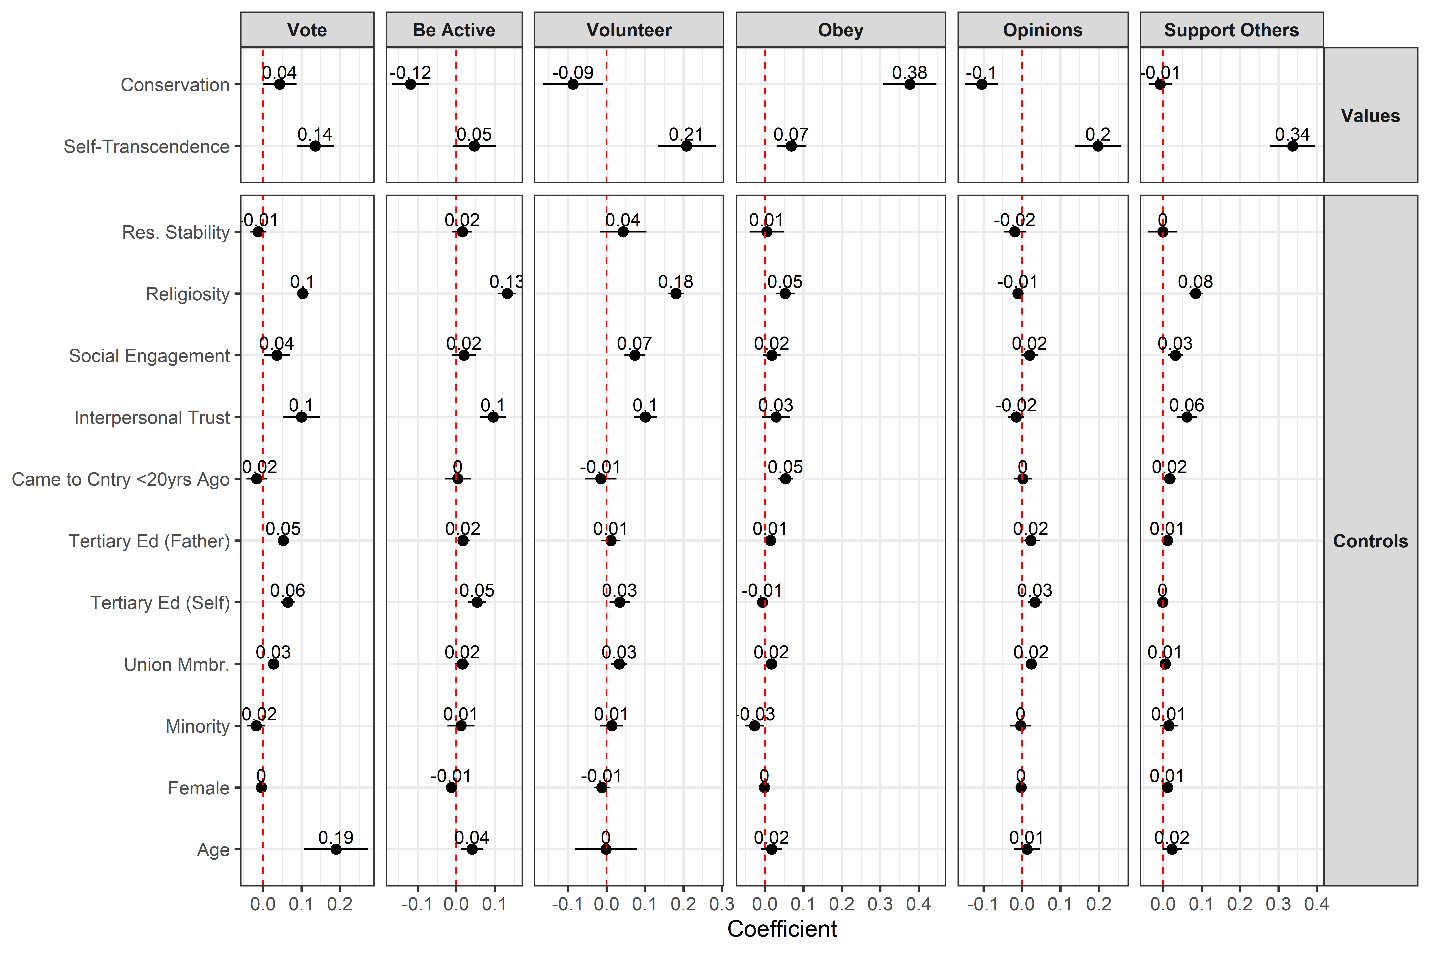


**Is the Conservation & Obeying Laws Relationship Robust to Exclusion of Conformity Norms?**

In text we found a substantial relationship between the conservation vs. openness-to-change dimension and the citizenship norm of following all laws and regulations. One potential worry may arise concerning this relationship given that some of the items used to measure this dimension also focus on following rules and laws. In particular, the items used to measure the sub-value of conformity might be potentially problematic:

- Tradition is important to him. He tries to follow the customs handed down by his religion or his family.
- He believes that people should do what they’re told. He thinks people should follow rules at all times, even when no-one is watching.
- It is important to him to always behave properly. He wants to avoid doing anything people would say is wrong.

Removing these three items yields a scale that is highly correlated with the full scale used in-text (r=0.90). But, what happens to the relationship between these dimensions and citizenship norms (especially “obeying all laws and regulations”) if we purge the conservation vs. openness-to-change dimension of these three items?

Figures OB3 and OB4 replicate Figures 1 and 2 from in-text but now use the reduced version of this dimension as a predictor. Removing these three items does impact the size of the relationship between this value dimension and the civic duty norms. The coefficient for this dimension and obeying all laws and regulations was 0.4 in Model 3 in Figure 1 but drops to 0.19 in this model. The value still has the same type of relationship but it is a weaker one than previously, albeit one that still outstrips the other control variables in its influence.

Perhaps more interesting are the changes to the relationship between this dimension and the participatory norms. The conservation vs. openness to change dimension no longer significantly predicts the voting in elections norm although its relationship with the other two norms is now always statistically significant and roughly double in size. The conformity motivations underlying this value dimension were thus the ones driving its positive relationship with voting, consonant with our argument for H2.

Thus, our results are broadly robust to the exclusion of these items.

**Figure OB3:** Replicating Figures 1 & 2 with the Reduced Form Version of Conservation vs. Openness


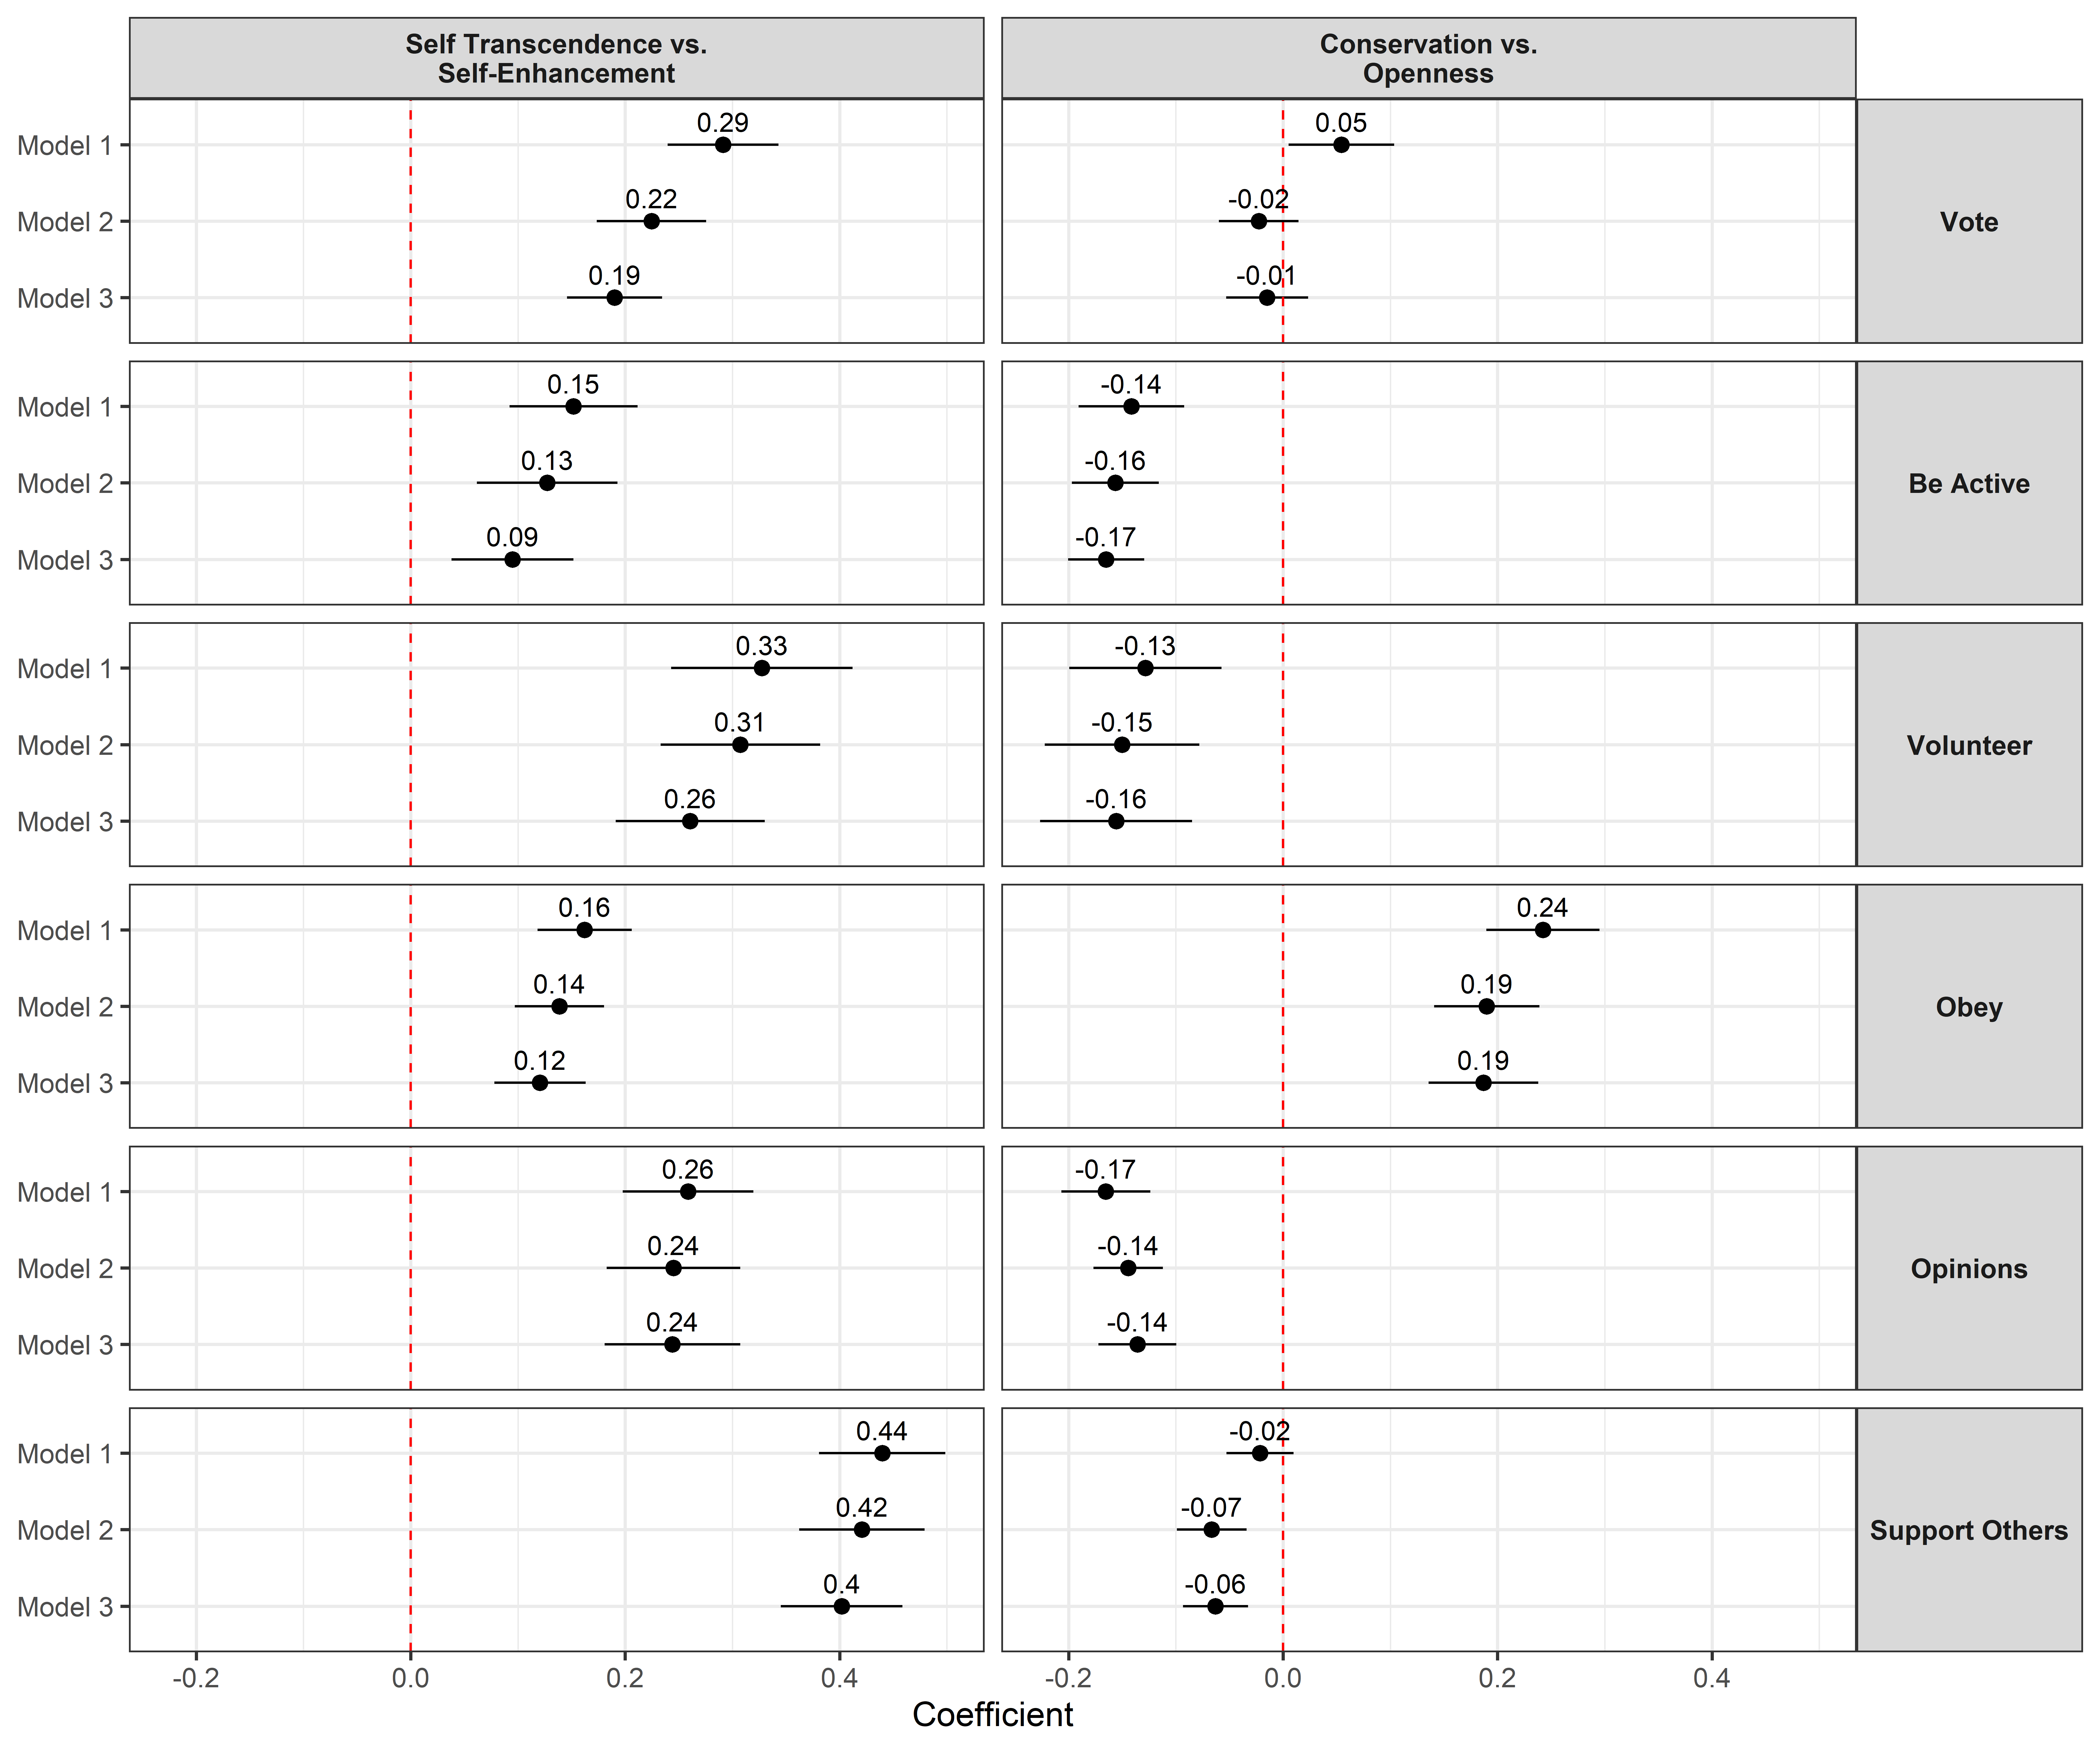


**Figure OB4:** Replicating Figures 1 & 2 with the Reduced Form Version of Conservation vs. Openness


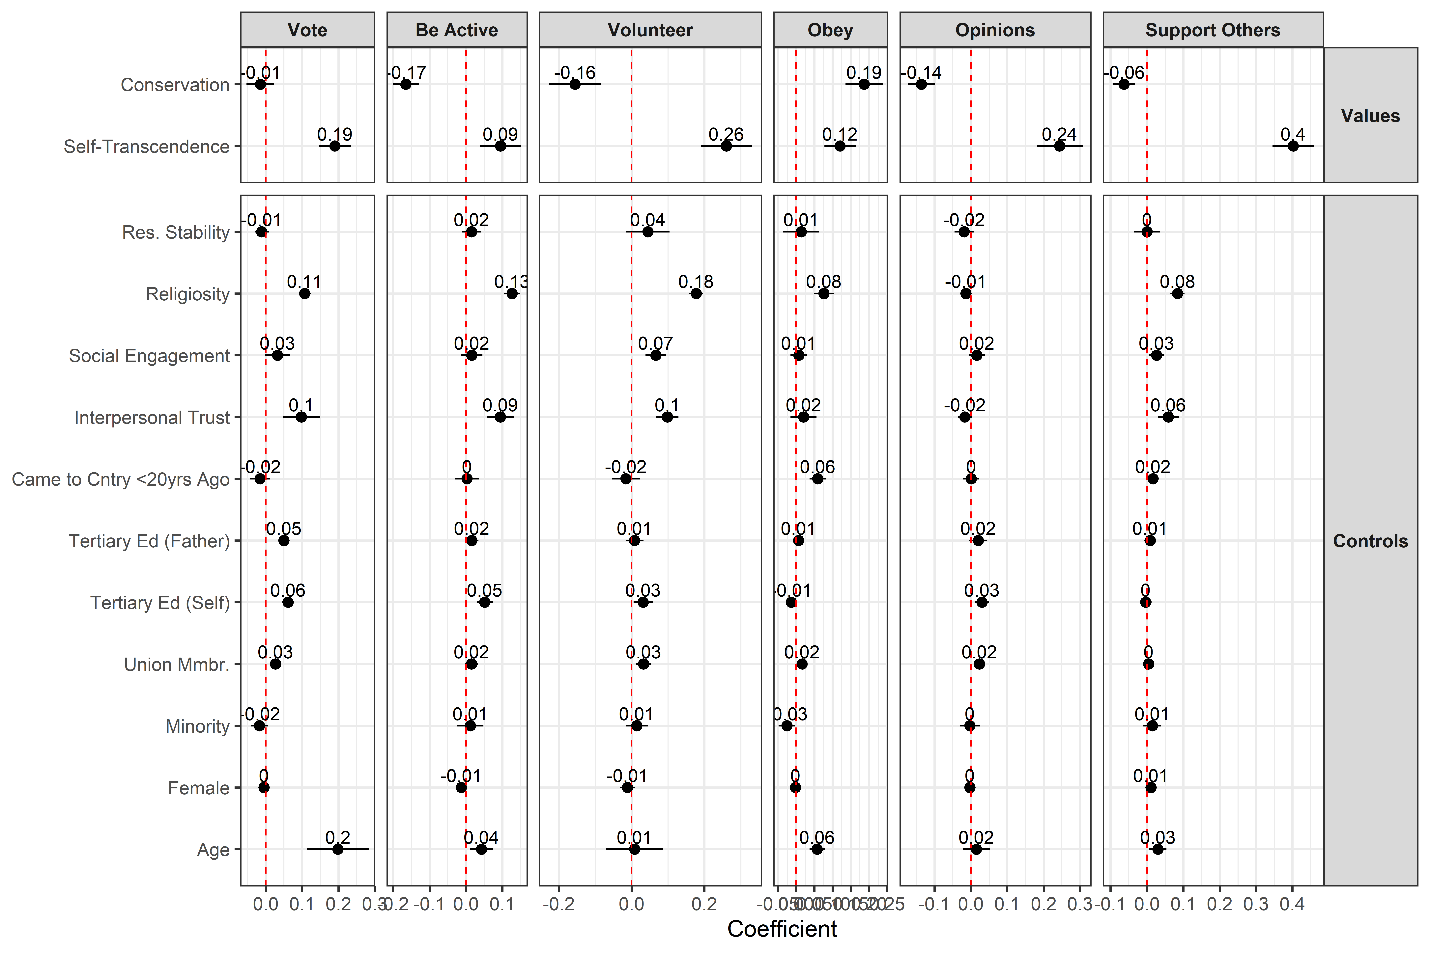


**Comparing Values and Demographics**

In our discussion of Figure 2 in-text we noted that the substantive relationship between the value dimensions and civic duty norms was often as large as, or substantially greater than, the ones observed for variables important in the existing literature on civic duty (and political participation) such as age and education. However, these characteristics should also be impacting norm adoption indirectly through value orientations. What happens if we compare the effect of demographics sans values as a control variable with the influence of values from Model 3 (i.e. the full controls model)?

Our focus here is on the following demographic variables: age, gender, education (own and father’s), union membership, being born in the country, and whether the respondent indicates that they are a cultural minority. We do not investigate religiosity, etc., because these variables are plausibly post-treatment to the demographics.

Figures OB5 & OB6 provides the relevant comparison. The coefficients in the “Values” facet at the bottom of the figure stem from Model 3 in-text. Two markers are provided for the demographics: the triangular marker is the coefficient for the variable from Model 2 in-text (i.e. controlling for the values, but not for religiosity, social trust, etc.), while the square marker provides the results when values are omitted. Two points can be observed. First, the relative influence of the values remains substantially greater than the vast majority of these indicators even when we omit the potential for post-treatment bias. Second, the strongest evidence for a post-treatment (or mediational) relationship between the demographics and the values concerns age, whose coefficient on obeying the laws and supporting others is markedly lower when the values are present than when absent.

**Figure OB5:** Comparing Values and Demographics (Participatory Norms)


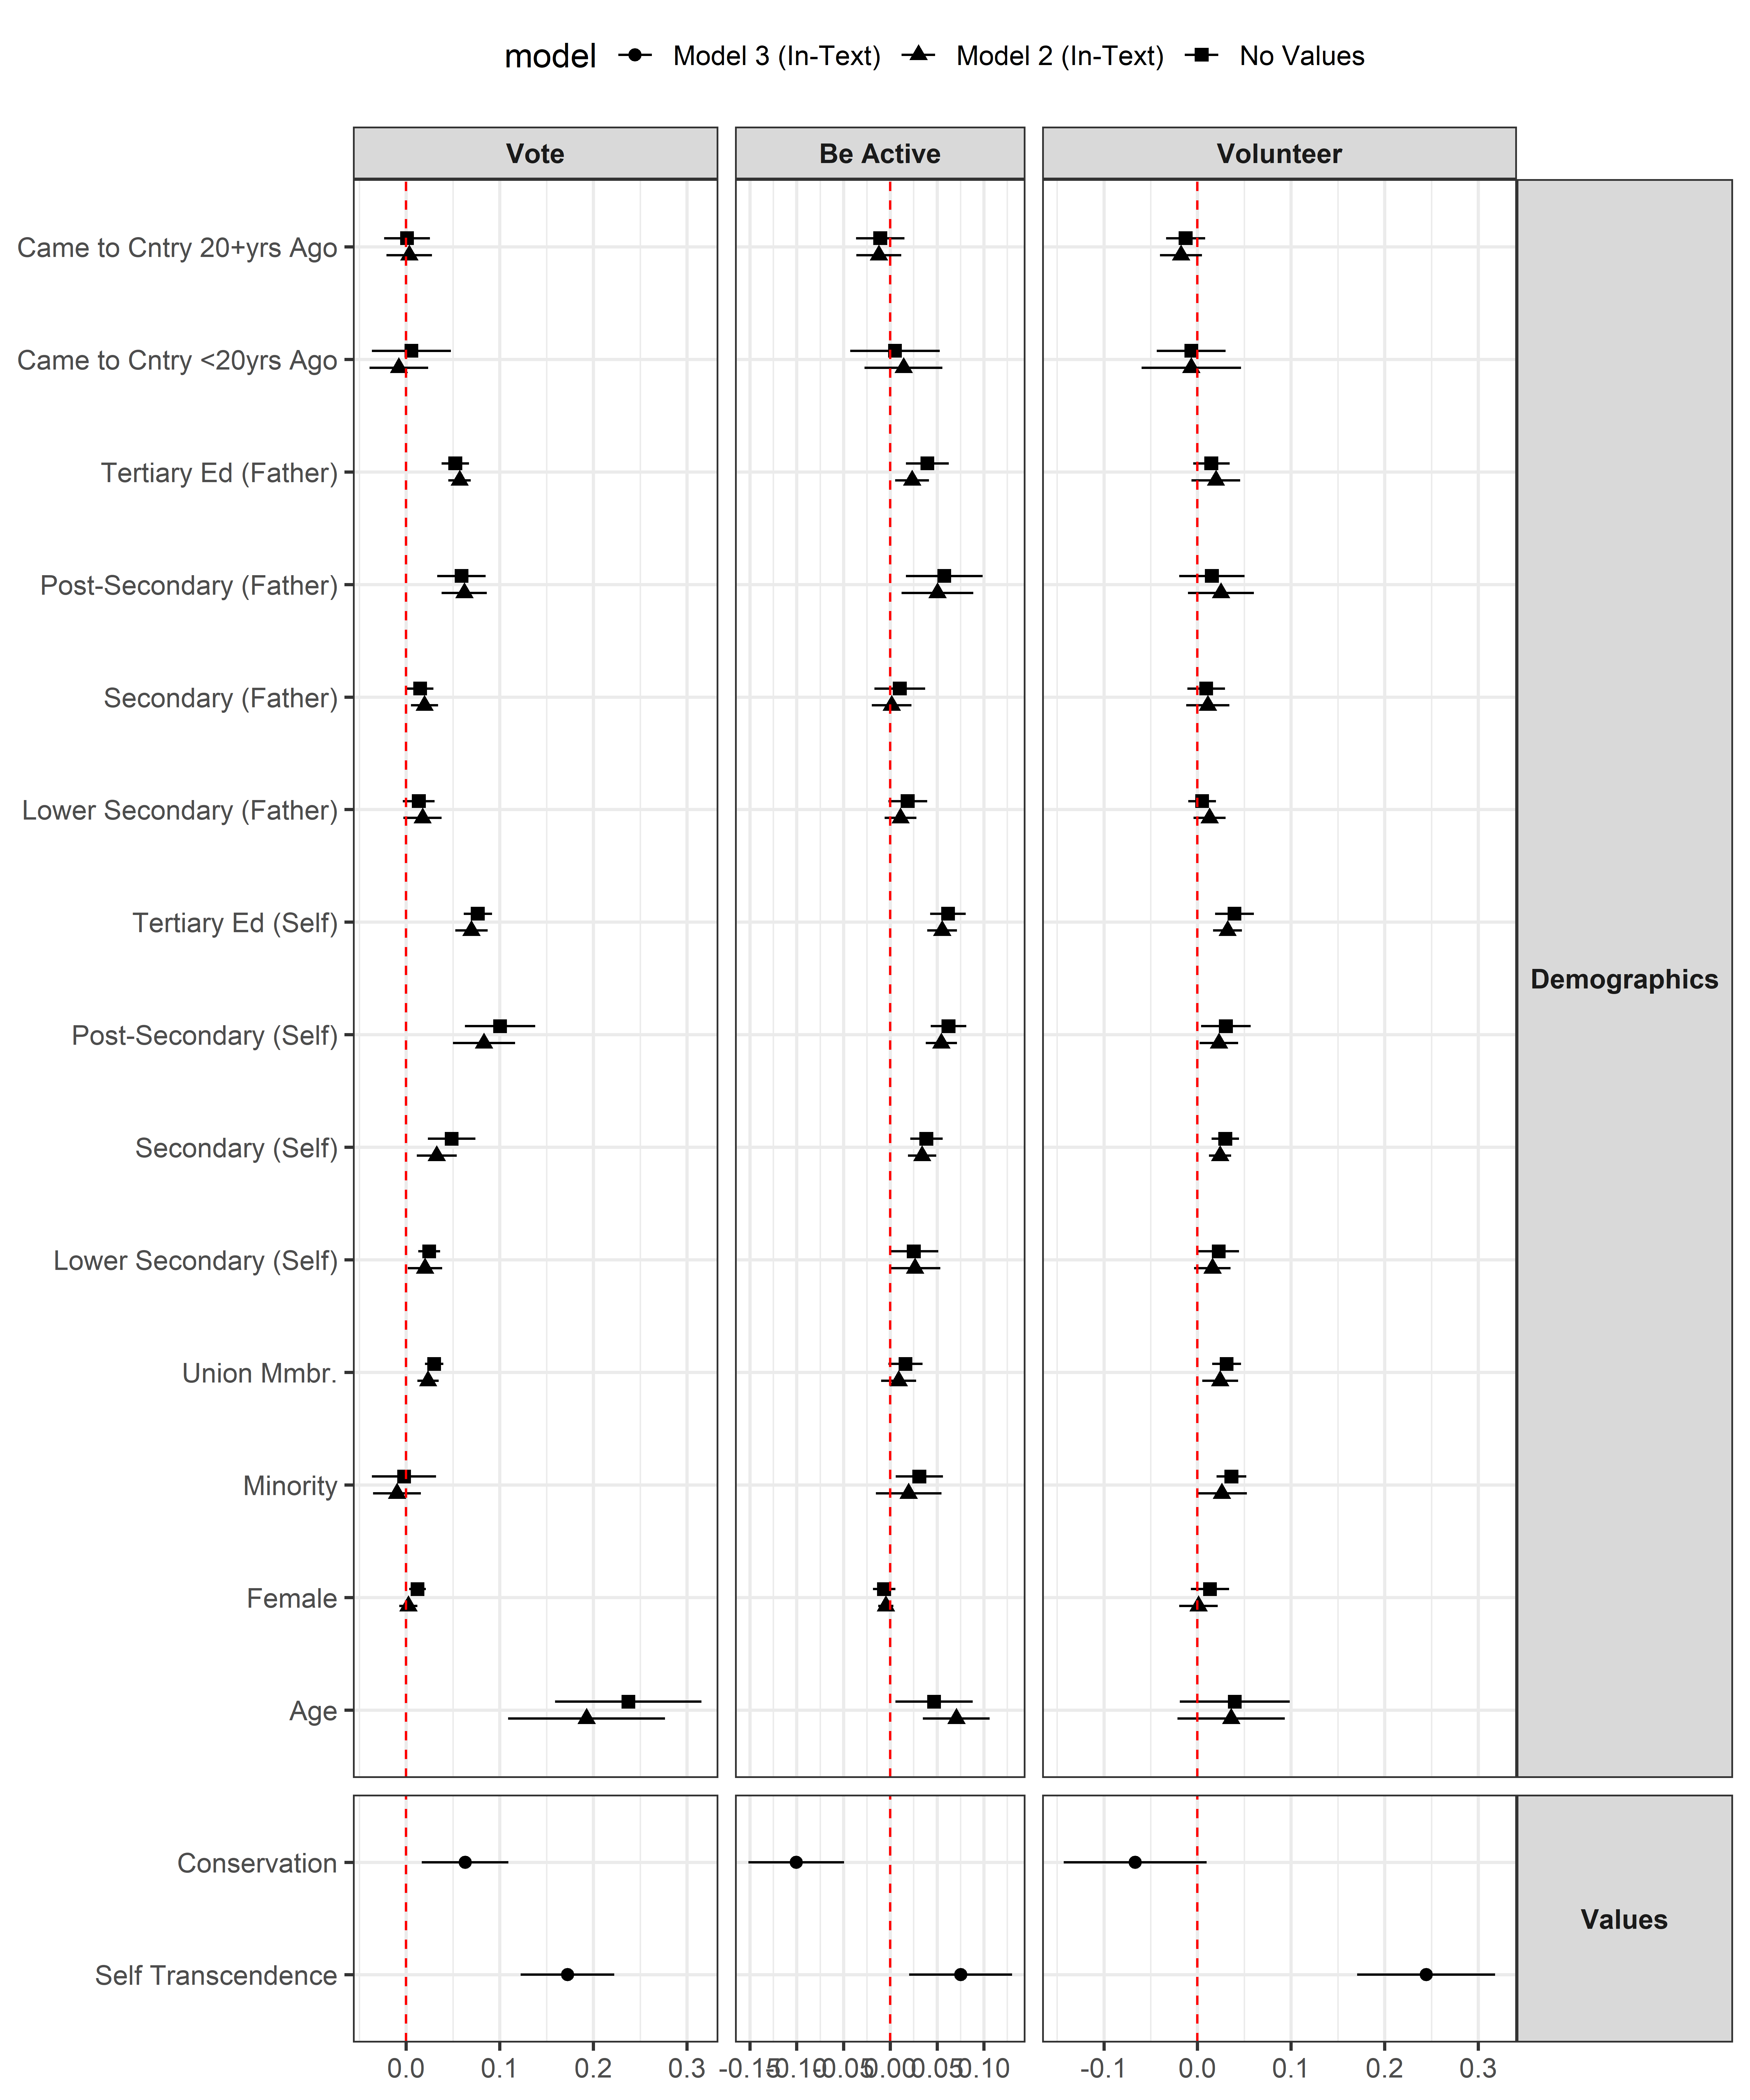


**Figure OB6:** Comparing Values and Demographics (Remaining Norms)


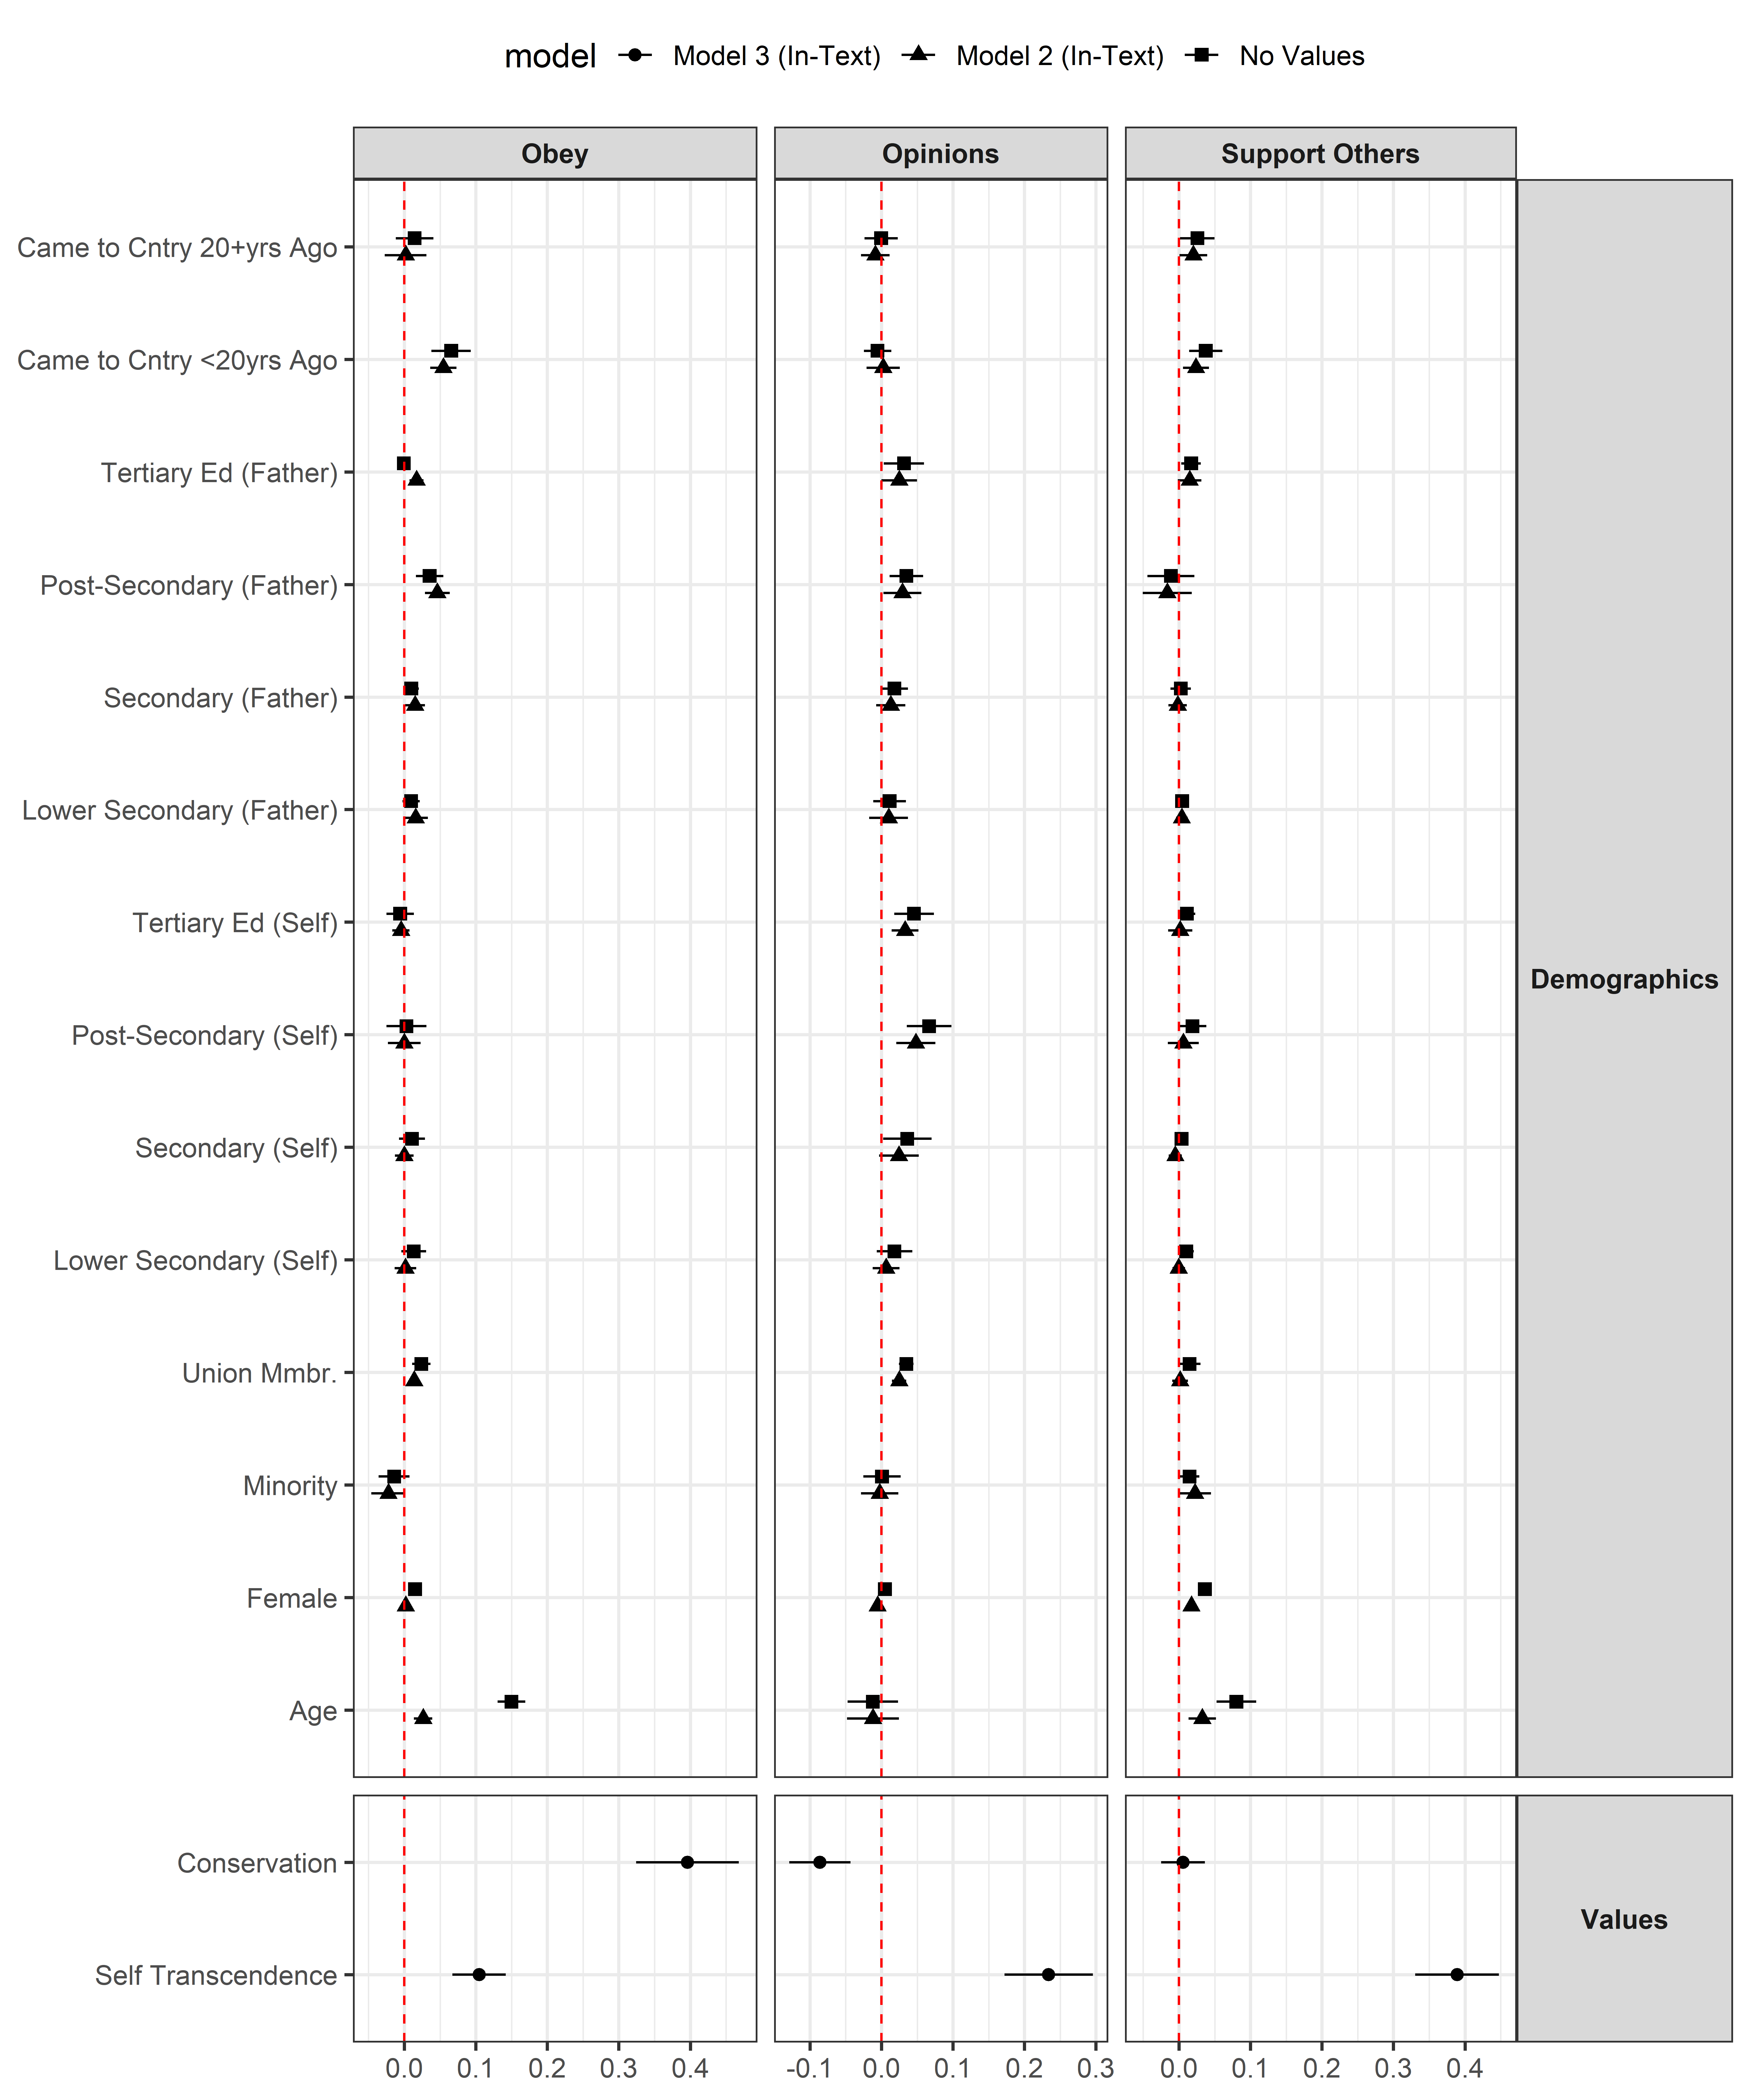


**Analyses without Belgium**

Our multi-level models control for a variety of country-level predictors of norm acceptance, although our primary interest is at the individual level (i.e. values). One question that arises concerns Belgium.[[1]](#footnote-1) In particular, Belgium has a compulsory voting law that may impact perceptions of the normative status of some of the duty norms examined here, perhaps most specifically voting in elections. What role does Belgium play in our analyses?

We begin with an examination of whether Belgian respondents vary relative to other Europeans in their adoption of the duty to vote in elections. Table OB1 provides the results of multi-level models that includes a binary variable (respondent is from Belgium vs. another country [baseline category]) and the country-level variables included in the models in-text.[[2]](#footnote-2) The coefficient for Belgian respondent is negative in each case (i.e., Belgians report lower average acceptance of each norm), but the coefficients are small and never statistically significant.

Figure OB6, meanwhile, provides a replication of our results but now with Belgian respondents removed from the analysis. The same patterns emerge as in Figure 1 in-text. Indeed, the coefficients shown in Figure OB6 never change by more than 0.01 (i.e., from 0.26 for Self-Transcendence in Model 1 in the vote in elections model [in-text] to 0.27 here; from 0.1 for self-transcendence on the obey measure (model 3 in-text) to 0.11 here.

Table OB1 and Figure OB6 thus show that Belgian respondents are not driving our results.

**Table OB1**: Average Norm Support: Belgians vs. Other Europeans

|  | (1) | (2) | (3) | (4) | (5) | (6) |
| --- | --- | --- | --- | --- | --- | --- |
|  | Vote | Obey | Support | Opinions | Volunteer | Be Active |
|  |  |  |  |  |  |  |
| Belgian Respondents (Baseline=Non-Belgium) | -0.09 (0.06) | -0.04 (0.06) | -0.05 (0.05) | -0.08 (0.05) | -0.07 (0.07) | -0.04 (0.07) |
|  |  |  |  |  |  |  |
| Socialist Country | 0.01 (0.04) | 0.08* (0.04) | -0.10** (0.03) | -0.01 (0.03) | -0.08 (0.04) | -0.02 (0.05) |
|  |  |  |  |  |  |  |
| Years of Democracy | 0.12* (0.05) | 0.05 (0.05) | -0.06 (0.04) | 0.04 (0.04) | -0.04 (0.06) | -0.00 (0.06) |
|  |  |  |  |  |  |  |
| Ethnic Heterogeneity | -0.08 (0.04) | -0.05 (0.04) | -0.02 (0.03) | 0.01 (0.03) | 0.06 (0.04) | -0.05 (0.05) |
|  |  |  |  |  |  |  |
| Constant | 0.74*** (0.03) | 0.80*** (0.03) | 0.80*** (0.03) | 0.82*** (0.02) | 0.58*** (0.03) | 0.44*** (0.04) |
| Observations | 40106 | 40260 | 40058 | 39839 | 39780 | 39783 |
| *AIC* | 2243.10 | -21240.71 | -17781.85 | -24282.55 | 5597.17 | 5214.50 |
| *BIC* | 2303.30 | -21180.49 | -17721.66 | -24222.41 | 5657.30 | 5274.64 |

Standard errors in parentheses

* *p* < 0.05, ** *p* < 0.01, *** *p* < 0.001

**Figure OB6:** Replication of Figure 1 sans Belgian Respondents


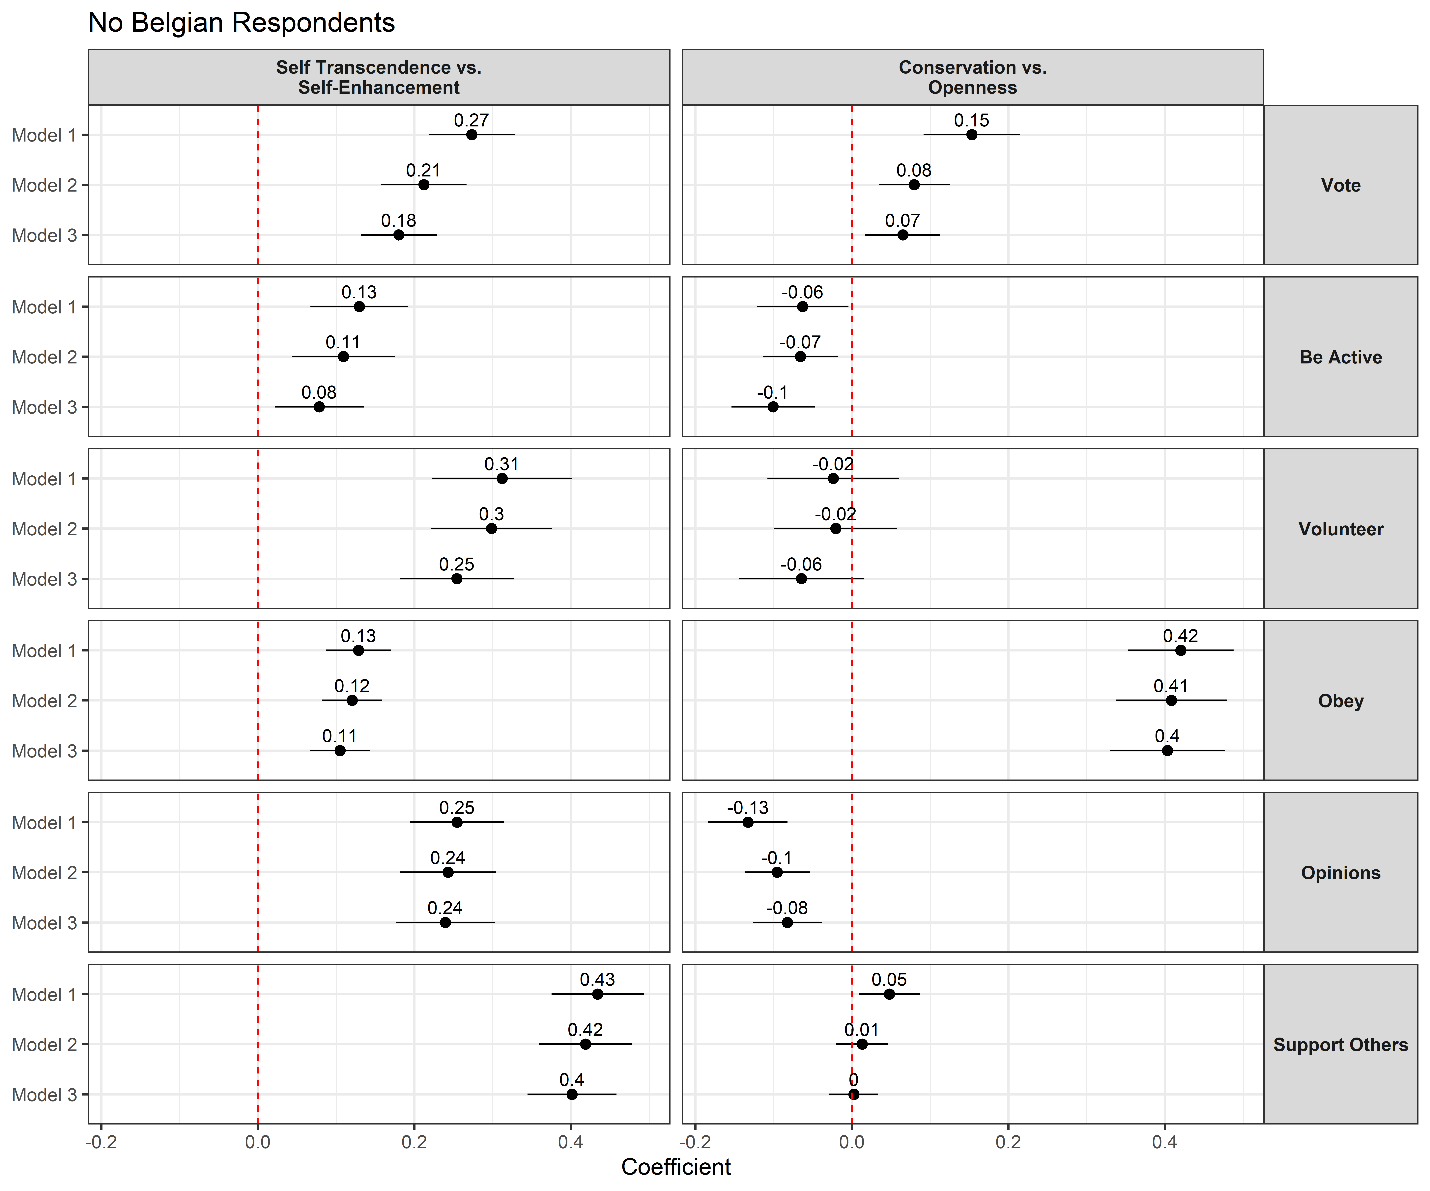


**Personality Trait Analyses**

In-text we use data from the cross-sectional European Social Survey to analyze the relationship between personal values and civic duty norms. Our key assumption is that personal values are exogeneous to duty norms, i.e. that civic duty norms do not cause personal values. A key warrant for our claim are panel studies of values and voting behavior showing that values measured before an election predict vote choices but that vote choices do not predict subsequent value reports (Schwartz et al., 2010; Vecchione et al., 2013). This evidence implies that personal values are not directly impacted by one’s political choices, at least on a relatively brief time scale. However, these studies do not directly speak to endogeneity in our particular case; perhaps one forms perceptions of the norms associated with one’s role of citizen and then updates one’s values to align with these norms. Our data cannot disentangle these two possibilities. Or, alternatively, perhaps there is some other stable trait formed prior to both values and norms; our data can avoid this issue only to the extent that such a trait is measured and controlled for in our models.

A superior research design would involve longitudinal data that enables an examination of whether changes in values are associated with changes in norms. Unfortunately, we know of no longitudinal study that measures both civic duty norms and the Schwartz value items over time.

One alternative is to focus on *personality traits* and civic duty via panel data from the British Household Panel Study/Understanding Society panel.[[3]](#footnote-3) Respondents were queried about their personality traits at two time points: Wave 15 of the BHPS (2005) and Wave 3 of the Understanding Society survey (2011). Respondents were also asked a question pertaining to civic duty in the latter wave: “I would be seriously neglecting my duty as a citizen if I didn’t vote” (response options: strongly agree, agree, neither, disagree, strongly disagree). We can thus predict a duty norm with a previously measured indicator of a person’s personality thereby limiting some of this endogeneity concern.

Examining the relationship between traits and duty norms in this way requires some assumptions to be meaningful. First, we have to assume that the traits map onto personal values in a coherent and substantial way, i.e. that examining the former will further our knowledge of the latter’s influence because it can act as a stand-in. On this point there is *some* reason to think that this assumption holds, but more reasons to be *very* cautious.

The optimist would say that traits and values are both elements of a person’s broader personality and thus should be related to one another. And, indeed, a meta-analysis by Leduc, Feldman, and Bardi (2015) shows some consistent relationships between traits and values across 60 observational studies: (1) the trait of openness to experience is typically positively correlated with “openness to change” values and negatively related to “conservation” values in the SVT; (2) the trait of agreeableness is positively (negatively) related to self-transcendence (self-enhancement) values in the SVT; (3) extraversion is positively related to self-enhancement values; (4) conscientiousness is positively related to “conservation values”; and (5) neuroticism is broadly unrelated to the SVT values. These results suggest that we may be able to use the personality traits as indirect proxies for personal values and, in turn, for self-related motivations.

However, a few points should be made here. First, the absolute value of the correlations in Leduc, Feldman, and Bardi are generally modest in scope, typically in the 0.2-0.4 range. Combined with other studies showing that traits and values predict different outcomes, Leduc et al. conclude that “although values are related, the two constructs are distinct” (p. 22). Indeed, while both traits and values may be a component of a person’s broader personality (Caprara & Vecchione, 2013), they are nevertheless conceptually distinct. Traits are descriptors of a generalities in a person’s behavior, whereas values are more abstract cognitive representations of what a person wants. Values are an inherently motivational concept and hence a better fit with our in-text focus on self-related motivations. Second, these modest correlations are not always ‘clean’. For instance, the correlations between the trait of openness to experience and the openness-to-change values of stimulation and self-direction are 0.36 and 0.52 respectively. Its correlation with the value of universalism, a core component of the self-transcendence scale, is 0.33 meanwhile. Likewise, extraversion taps into the values of power and achievement from the self-enhancement superordinate value (0.31 and 0.31 respectively) but also into the value of stimulation (r=0.36) which is part of “openness to change”. It is thus not always clear how to map our expectations onto these traits since they overlap with multiple values. Finally, it is not necessarily the case that these relationships reflect a causal relationship wherein traits influence values (or vice versa). Vecchione et al. (2019) report the results of a longitudinal survey in which young Italians were surveyed at three times points (2004, 2008, and 2012) with the Big Five and SVT measures on all waves. Much as in the meta-analysis, the authors find small to modest correlations within any given wave between values and traits of the type noted above. However, in only two cases (agreeableness 🡪 values of benevolence & power; openness to experience 🡪 self-direction & tradition) do their cross-lagged panel models suggest that this might be a causal relationship. The other relationships may be “due to common antecedents, such as temperamental dispositions or shared genetic components” (p. 423), which further muddies the waters in using the traits as a stand in for personal values.

A second assumption concerns the dependent variable: civic duty. Unfortunately, this was not measured in Wave 15 or prior of the BHPS (i.e., time 1 in our analyses), meaning that we cannot examine whether changes in traits influence changes in duty via either cross-lagged models of individual level fixed effect models (Finkel, 2008). In regressing duty as measured in 2011 on the change in a person’s traits between 2005 and 2011 we must assume that something else didn’t change which in turn affected both the change in traits and the duty norm (e.g., a time varying omitted variable) and that the change in traits does not reflect a person changing their responses to the personality trait indicators to reflect their existing (and stable) civic duty.

We now turn to analyses with these caveats stated. Our DV is the duty norm, rescaled so that higher values = more duty (i.e., agreeing that not voting would be a violation of duty). Our main independent variables are the respondent’s personality traits. In particular, we focus on *changes* in the traits between the two waves. We first fit a confirmatory factor analysis in which separate factors for each trait X wave were included (i.e., one factor for the trait of openness to experience in 2005, another for that trait in 2011, and so on). We then predicted the respondent’s factor score for each dimension. Table OB2 provides correlations between the factor scores over time, which range from 0.66 (conscientiousness) to 0.95 (neuroticism). Our independent variable was then created by subtracting traits scores measured in 2005 from those measured in 2011 (i.e.: openness to experience in 2011 – openness to experience in 2005, etc). Figure OB8 plots the distribution of change scores; most respondents are clustered around 0 (i.e., no change), but some do show substantial change in one direction or the other. We also include in this model the following controls: age in years in 2005, gender, and the number of people in the household in 2005 (logged). Older individuals may be socialized in a different environment (e.g., higher voter turnout) than younger ones and also less likely to see changes in their personality traits. Men and women may experience different socialization experiences as well that could affect these variables. Finally, variation in household size could affect the type of information people have about politics and hence beliefs about duty.

Table OB3 provides the regression results. Individuals who reported higher levels of agreeableness in 2011 than 2005 were more likely to think that non-voting was a violation of their duty as citizens, with this coefficient being statistically significant. Individuals who reported higher levels of extraversion, on the other hand, agreed less with this statement. The correlational studies cited above suggest that these traits are modestly related to the self-transcendence (agreeableness) vs. self-enhancement (extraversion) value dimension used in the manuscript, which had a similar relationship to the voting duty norm as here. Changes in openness to experience and conscientiousness, meanwhile, are associated with higher and lower levels of the DV respectively, although neither coefficient is statistically significant. These results are more in tension with our in-text results insofar as one takes the former trait as capturing openness-to-change values and the latter conservation values; in-text we found that the conservation vs. openness-to-change value had a positive (albeit somewhat small) relationship with the duty to vote. However, as noted above, the openness to experience trait item is not a pure analogue for the value items as it overlaps to some extent with one of the values in the self-transcendence/self-enhancement dimension that, in turn, would lead us to predict a positive relationship. Changes in neuroticism, meanwhile, are unrelated to the civic duty norm, although neuroticism appears to be the trait least linked to personal values. These results thus give some further support for in-text theory, but also some discordant notes; we are hesitant to make too much of either result as an indicator of the influence of personal values on civic duty for the reasons discussed above.

**Figure OB8:** Distribution of Trait Change between Panel Waves


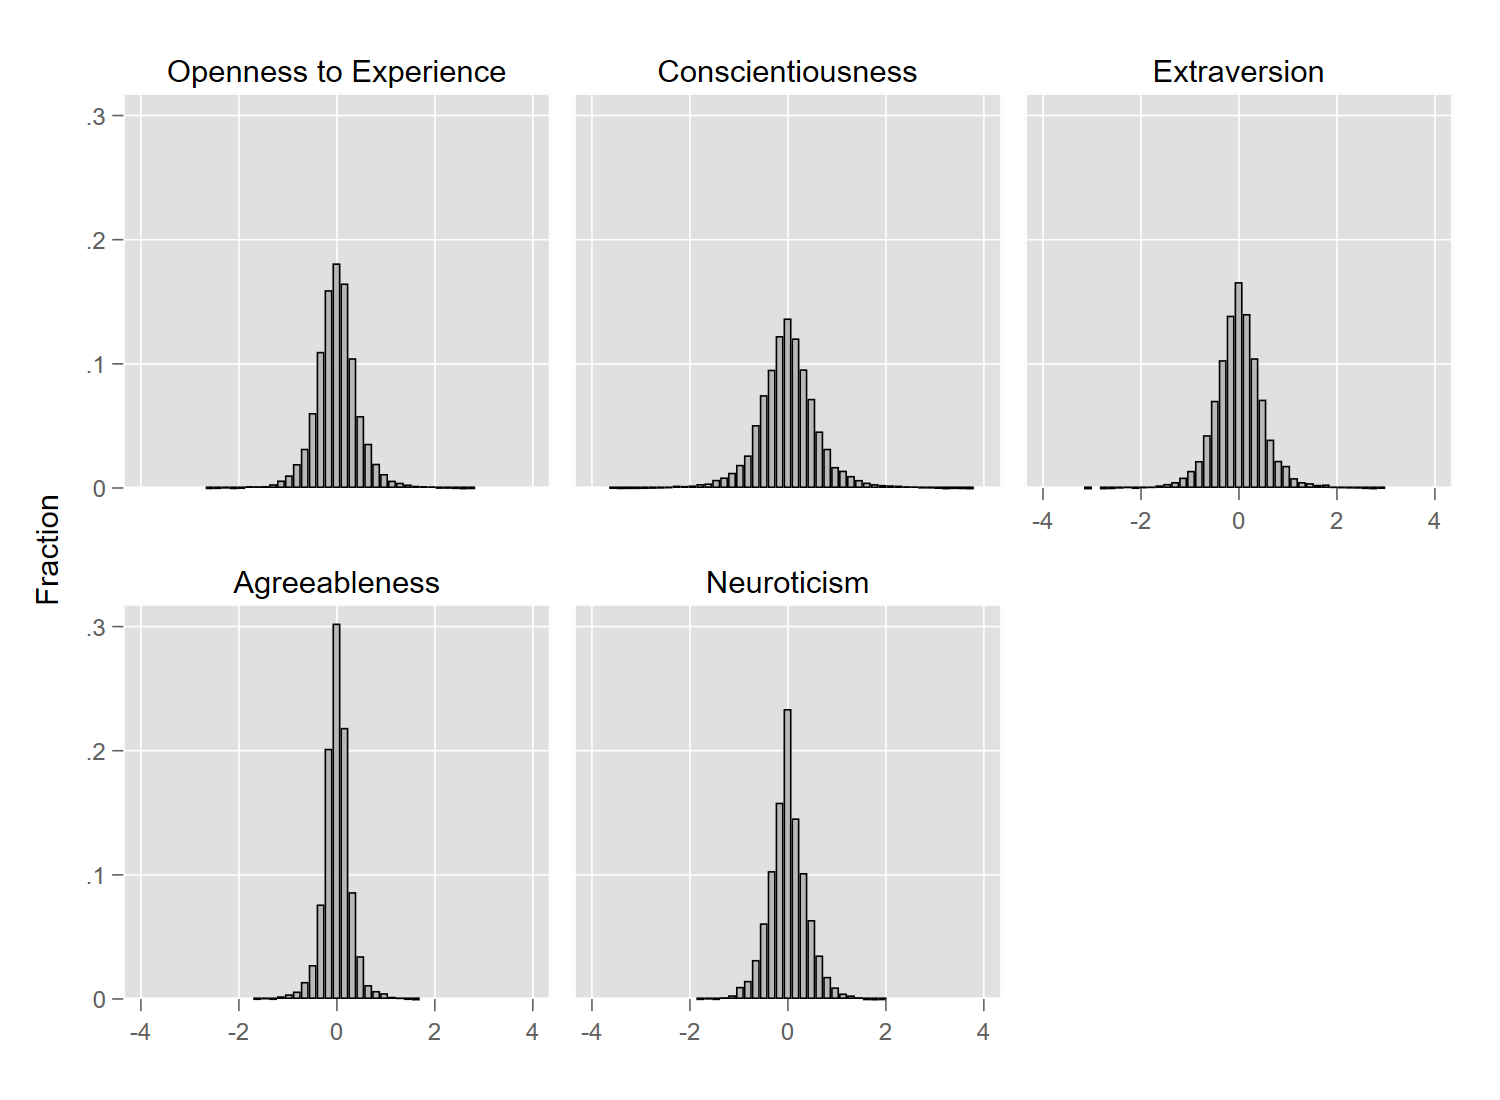


**Table OB2:**

|  | Correlation between 2005 and 2011 Factor Scores |
| --- | --- |
| Openness to Experience | 0.86 |
| Conscientiousness | 0.66 |
| Agreeableness | 0.68 |
| Extraversion | 0.88 |
| Neuroticism | 0.95 |

**Table OB3**: Personality Traits and Voting as a Duty

|  | (1) |
| --- | --- |
|  | Duty to Vote |
| Change Open. to Experience | 0.24 (0.17) |
|  |  |
| Change Conscientiousness | -0.36 (0.18) |
|  |  |
| Change Extraversion | -0.35* (0.15) |
|  |  |
| Change Agreeableness | 1.13** (0.36) |
|  |  |
| Change Neuroticism | -0.09 (0.06) |
|  |  |
| Age in Yrs (2005) | 0.02*** (0.00) |
|  |  |
| Female | -0.06 (0.04) |
|  |  |
| LN of Household Size (2005) | -0.06 (0.05) |
|  |  |
| Constant | 2.99*** (0.09) |
| Observations | 9133 |
| *R*2 | 0.075 |

Standard errors in parentheses

Models use survey weights.

* *p* < 0.05, ** *p* < 0.01, *** *p* < 0.001

**References**

Caprara, G. V., & Vecchione, M. (2013). Personality Approaches to Political Behavior. In *Oxford Handbook of Political Psychology* (pp. 24–58). Oxford University Press.

*ESS1 - 2002 Documentation Report, Edition 6.3*. (2012).

Feldman, S. (2003). Enforcing Social Conformity: A Theory of Authoritarianism. *Political Psychology*, *24*(1), 41–72.

Finkel, S. E. (2008). Linear Panel Analysis. In S. Menard (Ed.), *Handbook of Longitudinal Research: Design, Measurement, and Analysis* (pp. 475–504). Academic Press.

Goren, P., Motta, M., & Smith, B. (2020). The Ideational Foundations of Symbolic Ideology. *Political Psychology*, *41*(S1), 75–94. https://doi.org/10.1111/pops.12683

Goren, P., Schoen, H., Reifler, J., Scotto, T., & Chittick, W. (2016). A Unified Theory of Value-Based Reasoning in U.S. Public Opinion. *Political Behavior*, *38*, 977–997.

Parks-Leduc, L., Feldman, G., & Bardi, A. (2015). Personality Traits and Personal Values: A Meta-Analysis. *Personality and Social Psychology Review*, *19*(1), 3–29. https://doi.org/10.1177/1088868314538548

Schwartz, S. H., Caprara, G. V., & Vecchione, M. (2010). Basic Personal Values, Core Political Values, and Voting: A Longitudinal Analysis. *Political Psychology*, *Vol. 31*(Issue 3), 421–452.

Vecchione, M., Alessandri, G., Roccas, S., & Caprara, G. V. (2019). A look into the relationship between personality traits and basic values: A longitudinal investigation. *Journal of Personality*, *87*(2), 413–427. https://doi.org/10.1111/jopy.12399

Vecchione, M., Caprara, G., Dentale, F., & Schwartz, S. H. (2013). Voting and Values: Reciprocal Effects over Time. *Political Psychology*.

1. We thank an Anonymous Reviewer for raising this issue. [↑](#footnote-ref-1)
2. This is basically equivalent to first estimating the country mean and then regressing it on these variables. The same coefficients occur in such an analysis with the standard errors varying only due to rounding in a couple of places (e.g., from 0.06 in the model for voting in elections to 0.07). [↑](#footnote-ref-2)
3. We thank an Anonymous Reviewer for this suggestion. [↑](#footnote-ref-3)
